# Supplementary material for: Metabolic reprograming of LPS-stimulated human lung macrophages involves tryptophan metabolism and the aspartate-arginosuccinate shunt
Source: PLoS One. 2020 Apr 8;15(4):e0230813. doi: 10.1371/journal.pone.0230813 (PMC7141605; doi:10.1371/journal.pone.0230813)
Supplement: S1 Data — (XLSX) [file pone.0230813.s003.xlsx]

## Sheet: Data
Sample	Variablename	M01_IL4	M01_LPS	M01_T	M02_IL4	M02_LPS	M02_T	M03_IL4	M03_LPS	M03_T	M04_IL4	M04_LPS	M04_T	M05_IL4	M05_LPS	M05_T	M06_IL4	M06_LPS	M06_T	M07_IL4	M07_LPS	M07_T	M08_IL4	M08_LPS	M08_T	M09_IL4	M09_LPS	M09_T	M10_IL4	M10_LPS	M10_T
Intracellular	IGCV1	1202892496	1166297912	1187640306	1181121348	1204808564	1193593361	1225415860	1179847534	1234731306	1184706581	1255731185	0	1209756544	1221162599	1175450009	1279744087	0	1184056312	0	1203913566	1174804866	1279101180	1205126813	1186562856	1192526988	1219904333	1101049454	1173360239	1169171180	1192758650
Intracellular	IGCV2	1245745218	1267766517	1271635791	1228785288	1253498715	1274986397	1258407424	1262710090	1351229809	1213281604	1300134781	1260612012	1317933340	1319633644	1363827963	1255509709	1309417526	1301889095	1342095954	1327614871	1275986657	1372598348	1317776102	1360751398	1312597507	1335440718	1261257167	1237309069	1342226486	1261500991
Intracellular	IGCV3	1205098154	1156712651	1162699657	1201277156	1179952749	1210363097	1168072706	1146709252	1256026248	418124118	297279471	414978300	939537856	497994048	204201627	1197508736	1228513450	1235971213	1159677344	1276264962	1189741723	222289859	457957828	400567378	517708957	433928573	0	439808117	656194383	353253690
Intracellular	IGCV4	1184198243	1132021010	906131031	1178891515	1056987495	1145591670	837735168	955097041	1149355572	0	0	0	0	0	0	975399704	490280284	596428907	783464350	1273984864	1239191498	0	0	0	0	0	645382405	0	0	0
Intracellular	IGCV5	929416448	732232267	571624181	635182442	794133270	696283246	753185730	775856815	757476791	654481960	1078301519	486218197	888255341	749237356	647402934	1174820087	651200754	709733662	713764893	976143130	668198735	715662183	633837814	838059776	685283993	627505691	761138427	516318034	729667309	738694344
Intracellular	IGCV6	823704384	1006829042	0	0	0	0	0	0	1031919266	0	0	409593450	0	985940946	0	0	0	341571835	0	0	0	0	0	0	0	0	0	0	0	0
Intracellular	IGCV7	795344000	820531251	730244368	684813659	809363747	545480798	743467759	997864947	915068279	413055703	468501172	500014432	705011106	840715770	446604574	487327480	670494912	389253161	300043576	666525927	457250542	557156843	637156375	496440085	259394729	481130926	437442191	519760503	677657569	683126668
Intracellular	IGCV8	668927656	652964415	457912547	550671771	579874444	439867300	525610916	777625420	499383325	562225477	477727966	239242180	550721653	168164376	120412688	379530624	424603650	91607454	127242683	633812501	461352767	470316589	272903835	119392133	190304700	124647313	154015584	431230826	329131730	487950176
Intracellular	IGCV9	799140525	248126876	689719482	931153408	629121033	526902291	458363735	175997303	388063060	996551261	380981698	161483776	506207641	496895173	304791086	693275776	525403464	451074670	528125264	167071273	119446837	428380743	394546938	247863404	558796894	266005709	516885155	593104686	597787761	735457024
Intracellular	IGCV10	649579584	529366602	430623081	411035481	522552972	484094308	497907877	482470741	470762294	382633303	1004224620	379982028	570938633	575093818	374239758	0	416477203	402505836	422614768	771951341	328889883	463378056	389995856	579519654	428544188	484648889	428412414	321858940	462486104	457247291
Intracellular	IGCV11	477175646	381946722	363575965	466937045	478628125	381185966	329307979	519948749	532585435	113372336	0	193085337	380502955	353722618	243397358	0	249430067	209921469	103465384	0	0	172285625	133147899	77477235	82113584	112954078	201592730	122813888	225047310	115761131
Intracellular	IGCV12	628780224	1163129954	575695516	309792858	853468750	469543778	581934713	1144054228	511973199	67886333	425210780	478424142	320006023	199473174	288055656	363861933	489905663	153874308	169002475	521423681	188548366	196667458	572155691	246162551	236229388	242625183	547595198	275552867	138289734	334912994
Intracellular	IGCV13	569057280	490920335	547208847	492876295	489118683	509866179	500758321	491483799	543995769	447052513	576903712	476487470	494752598	541221864	433283467	588434379	444792902	472486462	485661004	536250630	497320559	469371798	470404368	480595541	509987776	517424404	505630372	421093213	495027714	536480914
Intracellular	IGCV14	550807408	419933315	458494972	390111687	601130314	597585057	343998756	0	505200288	0	0	386217001	427188354	311168513	379267935	414821612	385041380	329796545	546725184	402673945	468702112	509874442	710321114	591462384	529687510	362163243	642685696	394266531	358330781	463875148
Intracellular	IGCV15	524033568	621813153	452304812	629975882	744007360	645972582	460334401	731535770	782514242	83764801	0	104566159	430909492	456605469	223553151	0	0	71909353	192049644	1016833647	642258991	0	0	0	0	0	0	0	108988897	0
Intracellular	IGCV16	406984428	0	0	0	437229162	403214841	256255200	0	639295107	79415349	265318521	117103172	327786393	305359132	0	389881446	138132738	106169605	123689984	0	0	470883270	202951330	132641041	133363726	172307928	455367951	93431585	215957225	181190702
Intracellular	IGCV17	454981984	379025427	448358470	429877706	416132833	359433159	446351079	389667499	446687775	424781297	489650077	422717072	423365073	467779055	335456507	529341467	369555583	364891495	416658592	405142487	393149067	412673969	407783029	429045182	322167267	413861300	468123249	356387983	406406696	493355866
Intracellular	IGCV18	432352004	588436484	338911031	192373038	378743959	645899620	459416820	575504922	476306556	96035955	562909573	455319871	404287119	419744748	439126692	261747333	249779207	390572417	343317904	428520444	367917158	363255170	346870024	534872384	300483711	562596755	441090420	355104131	332543583	303369102
Intracellular	IGCV19	380376855	232407738	359341458	465086070	279668553	295046154	390352576	227819985	279042520	364763434	241859254	319776357	328620358	329723746	166613773	417408105	361863326	222867164	345278566	216368437	268752186	196537568	266432044	280895842	275509651	192820784	259463175	299699471	303074436	422986971
Intracellular	IGCV20	251730416	0	223548502	216631733	257118666	227048730	221636191	0	234327627	115766731	262265408	243613435	254230164	257017974	215225534	232370335	201202842	259338685	227576464	290925521	220435618	234828978	247107974	236766390	246831477	219982198	271153254	201840619	206517279	223763970
Intracellular	IGCV21	239986656	242835919	223766484	248972661	274463585	209037343	214099572	187377004	246721728	187377965	195150011	222596811	230408117	236246605	197463091	245598932	201643970	212035686	191707758	201627971	106951431	175424954	150851902	154198995	154450830	152867751	200273122	187587233	206763753	179287562
Intracellular	IGCV22	200368416	276095425	301489413	316270299	164894281	165747311	338309427	378579888	410751761	128992325	0	199834650	251638806	309885422	187618296	0	101042549	156386685	0	0	0	187276872	187180548	109836194	0	140405501	0	143421901	285898650	202413497
Intracellular	IGCV23	188870770	179206971	183685710	179307701	183318567	183466381	176279138	178867317	176693231	160053723	226773140	172394457	176386266	200216742	174365552	220527270	171515183	168824728	171600088	178808701	180317969	186126295	184134208	176859359	180551947	174749523	191331172	157941759	181508919	202792883
Intracellular	IGCV24	179789696	169568277	145576181	157280533	164657759	186871971	157091880	157038818	174574026	147674920	204295440	163067343	171935590	178413156	167714479	203559293	143811047	159283447	165141872	181030235	151365286	178018373	153708972	180671493	157705330	181763073	176272743	148030866	162302339	191290067
Intracellular	IGCV25	160234272	115078732	152297072	248661021	142774601	121917877	183722466	0	83671432	381795981	110362807	106562219	115780766	110959722	99074313	188886184	121466634	105792374	155961966	0	0	103265546	102274889	80790518	127274373	0	166213360	116281513	123197063	171548491
Intracellular	IGCV26	160032848	142128149	144991000	134081444	144788178	151553544	140358517	155320931	162522029	121423639	177627013	139852504	145091849	176935655	144554092	158398797	124748731	149471268	142950560	154788504	124297218	157232338	134533314	148408800	131754225	155786624	152788278	122685525	150267829	157435793
Intracellular	IGCV27	158396624	123495464	140418761	119991588	0	0	144788422	192173396	243498912	0	0	0	209203574	188174166	0	0	0	0	0	0	0	146999872	0	0	0	0	0	0	132321097	0
Intracellular	IGCV28	143143441	0	99068423	0	118529841	92360938	139088229	0	133822159	0	73412919	0	140466080	0	0	97582546	46762885	0	0	0	0	0	44776184	0	0	0	0	66755003	0	84433905
Intracellular	IGCV29	146202912	130797003	117697441	135263883	114503755	134156889	127096623	138190648	137769947	121294378	149729564	134482424	145433302	147727243	132250048	152269064	97428889	141346574	137514195	141140840	124646567	147315695	133260137	122229922	132938443	139249343	129029069	105468412	131929436	139976355
Intracellular	IGCV30	133922504	146952995	124534205	109400754	0	0	0	123546014	175925788	0	0	112844611	133172584	148191209	0	0	0	0	0	0	0	0	0	0	0	0	0	0	0	110752362
Intracellular	IGCV31	133201272	79761601	146063450	224198888	111027734	95854739	168853695	63087179	74743977	219954142	0	103480826	105580321	96399816	73200246	188000677	114252438	84455201	126378862	89390489	64565558	82370058	82002309	73300872	127586723	84687097	103350650	112724962	114585281	172428148
Intracellular	IGCV32	137343608	149593016	94648066	150870079	152408574	146633973	65833733	114447079	148712983	0	0	0	54865101	45719518	0	0	51246497	54957308	55729624	408110289	247194536	0	0	0	0	0	53068025	0	0	0
Intracellular	IGCV33	125066565	106938191	114019290	79184453	0	58663599	56203789	0	82931821	45522535	0	0	68470392	68438701	0	0	44405270	0	0	0	71248074	0	0	0	0	0	0	0	0	36693766
Intracellular	IGCV34	117971677	129286368	96885656	203618901	169655129	189089808	90341642	231914231	338422614	0	0	0	0	0	0	197552138	112210603	117633650	195678705	648575459	495957161	0	0	0	0	0	130855547	0	0	0
Intracellular	IGCV35	119112541	66504355	115171564	148560430	88427579	79379411	136180452	87594919	74832534	110121992	0	110071287	106545364	96755752	47421439	134406014	90134527	51747717	95146328	58912611	75387626	56696431	76381879	88188507	68001113	43492731	79626752	94923240	90343647	140197811
Intracellular	IGCV36	103558627	112136600	95671817	71841767	98293012	55229912	94149530	72827902	104950770	0	0	58501891	82423071	89786283	71381173	96267616	78946434	74302089	50158838	60749045	0	54138522	0	0	0	45712862	80762062	53586970	63137383	45435849
Intracellular	IGCV37	105280321	0	83657219	91221385	114066373	97128045	68458528	0	89860553	0	135175966	0	96217224	0	0	100292686	63540216	107477240	109670441	0	0	96542345	81749389	100871011	85945382	0	0	67608681	0	88621454
Intracellular	IGCV38	106103265	0	103840903	118604096	99845097	98139840	0	82027697	93762316	113813551	131530513	111798860	97852631	110151683	59091352	145588840	107242820	76053973	97153409	88676970	89273422	74478154	83954874	105339855	101143592	80216124	99074774	94592503	102866398	121803812
Intracellular	IGCV39	99962997	484412533	116007583	0	82691505	142146407	286180069	0	0	0	0	0	0	440924483	0	0	0	64255481	0	0	0	0	255128480	58352681	0	0	120549237	0	0	0
Intracellular	IGCV40	99561208	95420758	103275191	89306809	77183148	100104803	85278956	97826513	98591449	76990722	110776453	89685884	99642403	107245035	90147632	109382159	81707314	99171616	96898613	98698055	71699480	94877768	87650094	86658093	92384371	95711126	92782790	84339946	101860726	104136961
Intracellular	IGCV41	88145048	89120701	92514178	83626847	75411378	101413025	93521182	89954981	106041381	80252923	93526133	84488947	97837192	113313085	84581411	103892508	80174072	97769886	96656866	99220426	81393630	93501448	88186784	86523636	85446287	96664998	81500290	75842642	90750824	98433794
Intracellular	IGCV42	88634784	96375116	96530130	0	0	0	0	104642535	92110435	0	0	0	125387552	103790358	78835564	0	0	0	0	0	0	0	0	0	0	0	0	0	0	0
Intracellular	IGCV43	86114323	119188608	83658925	89719158	77684090	69666406	98441313	0	0	0	0	0	83478719	59591469	0	62457745	51369547	0	0	70123532	70911912	0	0	0	0	0	0	0	0	0
Intracellular	IGCV44	81690456	0	0	0	0	0	0	103131606	75214091	0	0	0	69470831	0	0	0	0	0	0	0	0	0	0	0	0	0	0	0	0	0
Intracellular	IGCV45	76985704	0	74256432	77199370	64558294	62010273	77257912	56842501	70291677	71346109	0	68741923	66734252	74313225	46628361	96381814	70663998	53725843	65672110	60328106	66120982	54656665	61979622	65450024	62195531	59485183	70064219	59600351	65114635	88290124
Intracellular	IGCV46	67812457	88578993	43539031	81782732	89822200	76267261	40306651	46523966	65471579	0	0	0	0	0	0	0	17690954	15658815	0	0	141329588	0	0	0	0	0	28526464	0	0	0
Intracellular	IGCV47	66667247	0	0	60299862	49274922	0	63536480	0	0	0	69947865	64173112	70331872	67110491	61539578	66194355	56449407	67806727	68662855	73628254	62757207	70425786	65072114	62791292	64495195	66571284	71171514	61024856	61662826	0
Intracellular	IGCV48	50732648	0	35846950	57041414	0	0	43978750	0	0	47524276	31688307	0	39149971	0	0	69544783	38974404	0	0	41229959	0	40954645	34838052	35089156	0	0	0	33454088	40605887	62109499
Intracellular	IGCV49	49093091	42001291	36469675	18688746	19155796	21322574	24639256	69423368	0	45853418	59316887	42988047	45193216	51363128	39227034	49608681	35888183	28486339	15062010	26970772	10747370	7918074	11743522	11615833	16049779	12689483	11866648	6196967	7750948	0
Intracellular	IGCV50	43724094	0	27876048	0	42053776	0	28242939	0	0	30390743	0	0	0	0	0	34659508	0	0	0	0	0	0	0	0	0	0	0	0	0	26730817
Intracellular	IGCV51	38353913	30049409	35006792	36530621	30844256	38888401	33337237	30941748	38773376	35482816	39639310	40142791	41379674	38709590	34577895	42476142	30172380	39012755	37717642	40803273	34575172	39443728	36765879	34982515	35203785	38597064	42785556	34736160	32418284	36241615
Intracellular	IGCV52	31285314	22727065	28690924	0	0	0	0	0	0	16466078	0	20667188	0	0	0	0	17380039	0	0	0	0	0	0	0	0	0	0	0	0	0
Intracellular	IGCV53	24548445	38735497	0	0	0	0	0	0	0	0	0	0	0	0	0	0	0	0	0	0	0	0	0	0	0	0	0	0	0	0
Intracellular	IGCV54	27514866	0	20531083	29287229	0	0	25315342	0	0	0	17887525	18663095	21436286	21833894	0	0	20708107	0	26771317	0	0	18693491	18142491	19997704	0	18543949	26465723	20823197	20571254	29661298
Intracellular	IGCV55	25212461	0	15575215	0	0	0	0	30491416	0	0	0	0	0	20505816	0	0	14608928	0	0	16514256	0	0	12542264	0	0	11347681	0	0	9951630	27632493
Intracellular	IGCV56	24451492	0	22910090	14483227	27588995	27605731	21132473	33576070	28967053	0	25423477	0	0	0	0	23166532	22990303	0	0	0	0	0	0	0	0	0	0	0	0	0
Intracellular	IGCV57	23999064	0	0	29448989	0	20725002	0	0	0	0	0	0	21113090	0	0	0	0	0	0	0	0	0	0	0	10599071	0	0	0	9996052	10274589
Intracellular	IGCV58	23684254	0	0	0	35850456	0	0	37384607	0	0	0	0	25340904	0	0	0	0	0	0	0	0	0	0	0	0	0	24928053	0	0	0
Intracellular	IGCV59	21996207	17027481	20331055	20828459	23854594	18584102	21330644	0	19725343	19501099	0	21016849	21341772	22058937	0	24476468	18556713	17913665	20081328	16619721	17885157	16985526	18149105	18927357	0	14820096	20719737	19050046	18685161	21543563
Intracellular	IGCV60	20212891	16215992	25493286	0	29045612	25220416	23463816	0	31775606	0	0	0	17936917	26301576	19227173	0	0	0	0	0	16973898	0	0	0	0	0	0	0	0	0
Intracellular	IGCV61	22579893	0	19171439	18245328	16335886	20703393	18664786	0	20490968	0	0	18632578	22408528	21351971	0	21252992	14654375	21611793	0	23064600	0	21435636	17945904	19838155	17276401	0	0	15891003	0	19793331
Intracellular	IGCV62	18498695	12041497	16169056	25025954	19100984	15108346	0	9575145	0	0	11488117	0	14756858	14300273	10965554	0	0	13522538	0	15525396	0	12164110	0	10063632	0	12480921	20489322	12698763	14756353	0
Intracellular	IGCV63	17709445	14433854	14445608	0	14706178	18727645	16789227	13849019	16908853	16138279	19251756	14970417	16811136	17685398	15350117	19089331	13150840	16715400	19419838	16949603	17223883	17880833	16514650	14649725	0	18653467	17561407	16048730	14401723	15728581
Intracellular	IGCV64	23749762	0	0	0	29948319	26620052	0	0	26729721	0	0	0	0	0	0	0	0	0	0	0	0	18981993	0	0	0	0	0	0	0	0
Intracellular	IGCV65	16165416	13760480	16162631	15925462	15568641	15147680	15404997	16793166	14718043	17286097	19903306	16009335	18131058	15452997	15932796	19321153	13164265	14913751	17364483	13018255	15430633	15414308	16733488	15865796	15177801	13104616	11585958	16553616	15603914	15755090
Intracellular	IGCV66	15219967	21813872	14901630	13860806	14745831	16745524	0	0	25604195	30394723	20379701	18909847	16629233	23238222	19655004	25452722	19248334	20845518	24435554	0	0	26797548	20926731	26014128	23137205	0	33709571	21938578	24036763	23809262
Intracellular	IGCV67	15194355	18803597	11598731	18771735	15993055	14375581	11613890	13260620	16680984	0	0	0	7620167	0	0	7793669	0	5453842	6965778	0	0	0	0	0	0	0	6403795	0	0	0
Intracellular	IGCV68	16212238	18078043	8876475	15505167	14634220	14413483	7855060	16767993	20882264	13835308	23038636	16350848	16625973	19549496	14395526	30241764	18989986	21283089	30799661	37326797	19306690	7528483	6016756	4820352	6958292	7759907	8004517	6830105	6809031	6160874
Intracellular	IGCV69	14107018	13772697	15304581	13323707	12751466	14672621	13702099	14169059	14690569	15798314	14560670	14203200	13268825	16133997	13730840	15263374	13140199	15065634	14364180	14279328	13520266	14283071	14449771	14770557	12741116	15341869	15974031	13457092	14067862	16080360
Intracellular	IGCV70	13647477	15169185	0	0	0	11754434	12083204	0	0	0	0	0	12818279	0	0	0	0	0	0	15181125	13157101	0	0	0	0	0	0	0	0	0
Intracellular	IGCV71	13285714	0	13742774	12336981	0	13980622	0	0	0	12510668	0	11986757	14178672	13706973	12857668	0	12951492	13913423	13245492	15062650	12651227	13253758	13866822	12736703	13347272	13096133	14818778	13306847	12387416	14273147
Intracellular	IGCV72	12666133	0	12321557	16104822	19145744	14625909	11172759	10441075	0	0	0	0	0	0	0	0	0	0	0	0	20522032	0	0	0	0	0	7078650	0	0	0
Intracellular	IGCV73	12579224	0	10091837	15778344	0	12992333	12026439	0	0	12790271	8273360	8491879	10612629	10114553	0	18693915	10225724	6885879	13364573	10673725	0	9966530	10839532	9277597	0	0	12722919	0	10282692	0
Intracellular	IGCV74	11675246	0	0	0	0	10018501	0	0	0	0	0	0	9844000	9341910	0	0	0	0	0	0	0	0	0	0	0	0	0	0	0	0
Intracellular	IGCV75	10135810	0	9553382	8746120	8631621	0	0	0	0	0	0	0	0	10620122	10016088	0	9310530	10239472	0	0	10280125	10437373	9303539	10242296	0	0	0	9881030	9852792	9424351
Intracellular	IGCV76	10999217	0	8488215	0	0	0	0	0	0	0	0	0	0	0	0	0	0	0	11670556	0	0	0	0	0	0	0	0	0	0	0
Intracellular	IGCV77	9734824	0	0	0	10333431	0	0	0	0	0	0	8365188	0	8147362	0	0	0	0	0	0	0	0	0	0	0	0	0	0	0	0
Intracellular	IGCV78	9623144	0	0	6306844	0	10470029	0	0	0	0	0	0	8596170	0	0	9252946	0	0	0	0	0	0	0	8765800	0	0	0	5750195	7549162	9556362
Intracellular	IGCV79	9606844	0	7638909	5808897	7993820	9284873	0	6792400	6537679	0	0	0	0	0	0	0	0	5362768	5151219	0	6426844	4942679	0	0	5169457	0	0	6608980	7421738	0
Intracellular	IGCV80	9598094	11247947	9955349	0	0	0	0	0	9397705	7947365	0	8806706	9753225	11080137	7364759	0	5860717	0	0	0	0	4761990	5088899	6084712	0	0	0	0	0	4075459
Intracellular	IGCV81	8293602	7708556	0	0	7882694	0	0	0	0	0	0	0	0	0	6261088	0	0	0	0	0	0	8126288	0	0	0	8044753	0	6815725	0	8399486
Intracellular	IGCV82	8370160	6351506	5920194	6173709	0	8298283	6269809	5410183	0	0	8262055	5968432	8198849	7594661	5960886	8513974	6187179	6827085	7941473	9503578	7517073	8892527	7081326	7558748	7802351	9211970	8430954	6204197	6164337	6538017
Intracellular	IGCV83	7599855	0	0	7382892	8486209	0	0	0	0	0	0	0	0	0	0	0	0	0	0	0	0	0	0	0	0	0	0	0	0	0
Intracellular	IGCV84	7532906	0	5527802	6442709	7067323	8339702	6693841	6863429	6800987	0	0	7098777	7306527	8556944	8878881	0	5932311	6748361	8898060	11158050	8088584	7588077	6033067	7169196	6561970	11124758	9462057	6274809	8997678	7307700
Intracellular	IGCV85	6564978	0	0	7328888	0	0	0	10340316	0	2025731	5474213	2596630	4043119	5778544	2499795	6816979	9711683	4974737	3293617	5614272	4056530	4106554	0	4283557	2257151	0	0	5213841	0	0
Intracellular	IGCV86	6450506	5641732	7290141	8098722	6165558	6805683	6504924	4971701	6385097	5490969	0	5916424	4721242	5401697	5015402	0	5357021	5093598	5860986	4815378	7603174	6237453	7073759	4895931	5965766	5372152	7536786	4778486	4555642	0
Intracellular	IGCV87	7948724	0	0	8157510	7270659	0	6171138	0	0	7788274	0	0	6068988	0	0	9438985	6846937	0	0	0	0	0	6222614	0	5009904	0	6669737	0	0	0
Intracellular	IGCV88	5895697	0	5923463	8315214	0	0	0	0	0	0	0	0	0	0	0	0	0	0	0	0	0	0	0	0	0	0	0	0	0	0
Intracellular	IGCV89	4750964	1380059	3311226	0	0	2857523	0	903870	3603467	0	1601349	0	0	3204497	0	0	0	1053624	113623	0	0	3836979	0	0	0	0	5140922	1488042	2383186	0
Intracellular	IGCV90	4893257	5339526	3605604	0	4680247	5893255	0	0	7816882	0	5512753	0	0	6123985	6431474	4884168	0	7766249	6743415	0	6473514	8112265	0	4192537	6805568	9598768	0	4354045	0	4307773
Intracellular	IGCV91	6563652	0	2550839	0	6731265	0	0	0	0	0	0	0	0	0	0	0	0	0	0	0	0	0	0	0	0	0	0	0	0	0
Intracellular	IGCV92	4273229	0	0	0	0	0	0	0	0	3128993	0	3850515	0	4194714	0	4775287	0	0	0	0	0	0	0	0	0	0	0	0	0	4615694
Intracellular	IGCV93	3817901	0	0	5636956	4761112	0	0	0	0	0	5366178	0	5151453	0	4187882	12315520	6626693	4667019	6702458	0	0	0	0	0	0	0	0	0	0	0
Intracellular	IGCV94	3617554	0	3185495	0	0	3413493	0	0	0	0	0	2940567	0	3634749	0	0	0	0	0	0	0	0	0	3096288	0	0	4196267	0	0	0
Intracellular	IGCV95	3467131	0	0	0	0	0	0	0	0	0	0	0	0	0	0	0	0	0	0	0	0	0	0	2363529	0	0	2398727	0	0	0
Intracellular	IGCV96	2847773	0	0	0	0	3760352	0	0	0	0	0	0	2724121	0	0	0	0	0	0	0	0	0	0	0	0	0	0	0	0	0
Intracellular	IGCV97	2607696	0	1924777	0	0	0	0	0	0	0	0	0	0	0	0	4928590	0	0	0	0	0	2147894	0	0	0	0	2324733	0	0	0
Intracellular	IGCV98	2325077	0	2055707	0	0	0	2926844	0	0	0	1459424	0	2150398	1977148	0	0	0	1173453	0	0	0	0	0	0	0	0	0	1942454	0	0
Intracellular	IGCV99	1368442	0	0	0	1161998	0	0	0	0	0	0	0	971919	0	0	0	0	0	1122025	0	0	0	0	0	0	0	0	0	0	0
Intracellular	IGCV100	588543	0	0	522920	588627	0	0	0	0	418008	0	0	0	0	0	0	0	0	0	0	0	0	426704	0	0	0	0	0	0	0
Intracellular	IGCV101	0	0	675555466	835447397	939911098	681936030	870964819	1071311418	0	260091299	370437848	0	878909775	0	379871175	0	712161793	0	323524151	0	0	746659908	788765216	537379746	436309552	710248343	742574525	604849792	782055678	803086022
Intracellular	IGCV102	0	293542899	0	183620144	190306855	176655940	0	0	0	0	0	0	0	0	0	0	0	0	0	385951699	234189201	0	0	0	0	0	0	0	0	0
Intracellular	IGCV103	0	29535503	41227865	66346880	0	24310676	38899412	0	0	0	0	0	0	44810328	16189766	0	25446818	15659376	0	0	0	22584902	0	0	0	0	0	0	38082415	27730627
Intracellular	IGCV104	0	0	0	30176161	0	0	0	0	0	0	0	0	37144524	0	0	0	0	33411232	0	0	0	0	35827037	0	0	0	0	35097493	0	0
Intracellular	IGCV105	0	16944751	23038704	27286998	17772815	17277934	27188997	0	18741721	29719514	16013169	26997918	21990406	25999892	0	31975904	24622738	16013423	22652292	15718339	16240060	15700292	15382429	19572047	18037864	13282221	17974780	21423596	22051675	0
Intracellular	IGCV106	0	0	14664679	20045746	0	18346033	0	0	22706959	0	0	0	0	0	5342153	0	0	8425748	0	0	0	0	0	6274604	0	0	0	0	0	0
Intracellular	IGCV107	0	0	20616561	18886186	25784805	25383954	0	15158493	0	0	3997803	2428671	0	5179884	0	15333452	18354539	0	0	47781017	38622158	0	0	0	6273786	0	0	4527979	5949358	0
Intracellular	IGCV108	0	0	0	17101357	0	0	15340122	0	0	13865404	0	14673014	0	16870069	0	0	0	0	20283928	0	0	0	16602850	0	0	0	20496465	0	15010304	19026636
Intracellular	IGCV109	0	0	14645476	16926140	0	22854083	17278858	0	0	0	0	0	0	0	0	0	11600011	0	0	0	0	0	0	0	0	0	0	0	0	0
Intracellular	IGCV110	0	0	19568350	14961752	0	0	0	0	0	0	0	0	0	0	0	22344834	0	0	0	0	0	0	0	0	0	0	0	0	0	13630440
Intracellular	IGCV111	0	0	0	13669359	0	25090372	23675222	0	0	23491626	0	0	0	0	0	0	0	0	0	0	0	0	0	0	0	0	0	0	0	0
Intracellular	IGCV112	0	12801319	12080447	12756814	0	14030024	13256866	0	0	12198022	0	0	14487571	14582266	13165248	0	0	13892780	0	14842382	12049201	13880150	13657929	12663776	13262641	0	0	11637638	0	12790936
Intracellular	IGCV113	0	11130180	9518731	9644562	10941586	9667552	0	0	10368713	9240332	12672327	8923491	9302455	10774103	8751749	13599676	9348434	9714765	9601854	10654264	8909267	9491018	9387439	9521882	8544404	10167064	10453790	9160733	9009981	9835626
Intracellular	IGCV114	0	0	0	9379125	7245519	0	0	0	0	7208835	7908095	8367334	8583755	7508317	6475194	0	10006362	7868944	9291480	0	7926880	0	3594637	4851753	5208625	0	6712996	0	0	4534698
Intracellular	IGCV115	0	11184904	0	9892819	0	11345663	10353911	10044811	11762477	0	13094880	9497267	12583132	12472308	9619909	0	9621130	9353004	0	14583388	10964234	12485820	10633497	11044176	12187528	12666100	14515968	9369153	10038396	10019614
Intracellular	IGCV116	0	0	6565838	7600950	0	0	7119485	0	8712466	0	0	0	10076660	9339315	0	0	0	0	0	0	0	0	0	0	0	0	0	0	0	0
Intracellular	IGCV117	0	0	0	6615149	7761780	6751528	0	0	0	0	0	0	0	0	0	0	0	0	0	0	0	0	0	0	0	3393268	4343936	3453920	0	0
Intracellular	IGCV118	0	0	4544343	3662805	4060604	0	3647955	0	3659360	0	3607749	0	3872893	0	0	0	3535361	0	0	3315492	0	3282038	3431228	0	2755250	2801813	3692986	3097524	0	0
Intracellular	IGCV119	0	0	0	2931663	0	0	0	0	0	2796539	0	0	3760251	0	3197661	0	0	3625212	3202804	0	2861603	3474087	0	0	3351675	0	0	2871159	3042236	0
Intracellular	IGCV120	0	0	2722790	2492440	3431447	3395416	0	0	3379427	1847806	0	1893637	2751776	0	0	0	0	1944119	2430308	4120879	2219302	2386286	0	0	0	2538134	2393431	0	0	2816215
Intracellular	IGCV121	0	0	1022948	1843129	0	1932093	0	0	0	642062	0	0	864146	0	657443	0	0	0	0	0	0	0	834431	689604	602725	0	1261836	0	0	0
Intracellular	IGCV122	0	0	1872072	2238676	2255778	1531013	2173825	1860345	2106244	1638948	0	2395918	0	2076711	0	0	1541598	0	0	0	0	0	0	0	0	0	2226763	1702751	0	2857195
Intracellular	IGCV123	0	0	680064	1003900	0	0	1069550	0	0	0	0	0	0	0	0	0	0	0	0	0	0	0	0	0	0	0	0	0	0	915919
Intracellular	IGCV124	0	0	0	914464	0	0	0	0	0	0	0	0	0	0	0	1335516	0	0	0	0	0	0	0	0	0	0	1186408	764632	861825	0
Intracellular	IGCV125	0	0	0	409061	0	647571	0	0	0	0	0	0	0	0	0	0	527420	0	0	0	0	0	0	660423	0	0	0	0	0	0
Intracellular	IGCV126	0	0	586011681	0	864234822	439979531	538762401	909183130	0	0	0	0	533895868	0	254389469	0	562604739	0	0	0	0	385091083	341640198	244755648	107115688	0	384712827	281897427	0	420571651
Intracellular	IGCV127	0	0	110738852	0	0	0	121962877	139262085	0	0	0	0	56512636	49792703	0	0	53768998	0	57019905	0	0	0	0	0	0	0	0	0	0	0
Intracellular	IGCV128	0	48124107	13751799	0	14444642	11472391	93537435	0	13112492	0	0	0	0	0	0	0	0	0	0	0	0	0	8929236	0	0	9238720	0	0	11184218	15583007
Intracellular	IGCV129	0	0	0	0	0	0	64233792	0	0	0	65178949	0	0	0	0	0	64978900	63938211	0	0	0	0	66642420	0	0	0	60978997	0	63045876	0
Intracellular	IGCV130	0	39804660	0	0	40761592	0	28841079	44745564	0	19655172	12867933	21437084	27103561	23119693	0	35268896	23311967	0	38590381	0	0	0	0	0	7423738	5189878	11829178	0	11008707	9324167
Intracellular	IGCV131	0	0	20346697	0	0	25145426	27289958	26405123	25980347	0	0	0	25986502	0	0	0	16953119	0	0	0	24955919	0	0	0	21711682	0	0	0	0	0
Intracellular	IGCV132	0	0	0	0	0	0	22277813	11205767	0	0	0	0	0	19914998	12265731	0	16953462	0	0	0	0	0	0	0	0	0	0	0	0	0
Intracellular	IGCV133	0	45474877	0	0	0	0	13204221	0	0	0	0	0	6469166	7158259	0	0	0	0	0	68549543	0	3284423	0	0	0	0	0	0	0	0
Intracellular	IGCV134	0	10366828	0	0	0	0	9952461	10441399	0	0	0	10630592	10851407	0	0	0	0	0	0	11875253	0	0	0	0	10460985	11739747	11070568	0	0	0
Intracellular	IGCV135	0	0	0	0	0	0	9836237	0	21284364	0	0	0	0	0	0	0	0	6517388	0	0	0	7706908	0	0	4082910	0	0	0	10700619	0
Intracellular	IGCV136	0	0	0	0	7968422	0	5945135	0	0	0	0	0	0	0	0	0	0	0	7856418	6799922	3748068	0	0	3991898	0	0	0	0	0	4794605
Intracellular	IGCV137	0	0	0	0	3311200	0	3118386	0	0	0	0	3752022	0	0	0	0	0	0	1934931	0	0	0	0	0	0	0	0	0	0	0
Intracellular	IGCV138	0	0	0	0	0	0	2834314	0	0	1436736	0	0	0	3229415	0	0	0	0	0	0	4299882	1037783	0	0	0	0	0	0	1659520	0
Intracellular	IGCV139	0	0	0	0	0	0	2801892	0	0	0	0	1575492	0	1806031	0	0	0	0	0	0	0	1526525	0	0	0	0	0	0	2047441	1185348
Intracellular	IGCV140	0	0	2631052	0	0	0	2514791	0	0	0	0	0	2954865	2542754	0	0	0	0	0	0	0	0	0	0	0	0	0	0	0	0
Intracellular	IGCV141	0	0	0	0	0	0	0	376428511	0	89445763	297547872	0	0	0	0	0	0	0	0	0	0	0	0	0	0	0	0	0	0	0
Intracellular	IGCV142	0	0	0	0	0	0	0	0	0	63782846	68285645	63447304	188687701	75820251	0	0	0	0	0	0	0	0	90486770	64318118	104121504	88541173	0	83755231	134361271	0
Intracellular	IGCV143	0	0	61801807	0	0	66793704	0	0	66082305	64098912	0	0	0	0	0	0	0	0	0	0	0	0	0	0	0	0	0	0	0	65660019
Intracellular	IGCV144	0	0	0	0	0	0	0	0	0	15726226	0	18397138	0	0	23145668	16999094	0	0	0	0	0	21045653	20903180	17534000	20031071	19788191	0	11256116	17382166	9684955
Intracellular	IGCV145	0	0	0	0	0	0	0	0	0	10088245	0	0	0	13669435	0	0	0	10574231	10869153	0	0	0	0	0	0	0	0	0	0	11432685
Intracellular	IGCV146	0	0	0	0	0	0	0	0	0	6647820	6691653	7212844	0	0	0	0	9435990	0	0	0	5080370	0	0	0	0	0	0	0	0	0
Intracellular	IGCV147	0	0	8794977	0	0	0	0	0	0	6027939	0	8069757	0	0	6568907	0	0	7228513	0	0	0	0	0	0	0	0	0	0	0	0
Intracellular	IGCV148	0	0	0	0	0	0	0	0	0	5429458	0	5844568	7544904	0	0	0	6894638	0	0	11995743	0	0	0	7347064	0	7233679	7429784	0	0	7194599
Intracellular	IGCV149	0	0	0	0	0	0	0	0	0	3693616	0	0	6082045	5829719	0	0	0	0	0	6399858	0	0	2792556	0	0	0	5100484	0	0	0
Intracellular	IGCV150	0	0	0	0	0	0	0	0	0	2629457	0	3268735	0	6295461	3060989	0	7240775	0	0	0	0	0	0	0	0	0	0	0	4600844	0
Intracellular	IGCV151	0	0	3250272	0	0	0	0	5743924	4930999	1765826	0	0	6304429	5080212	0	0	3542347	0	0	0	0	0	0	0	0	0	3335222	0	0	0
Intracellular	IGCV152	0	0	0	0	0	0	0	0	0	1130951	0	1396936	0	3039478	0	0	0	0	0	0	0	0	0	2277814	0	1839899	0	0	1978647	0
Intracellular	IGCV153	0	0	1612995	0	1567238	0	0	0	0	614275	0	0	0	0	0	0	1005080	0	0	0	0	0	0	0	0	0	0	0	0	0
Intracellular	IGCV154	0	0	0	0	0	0	0	0	0	0	0	50523851	50930084	48227818	46542694	0	0	45280658	51109251	65457704	59298500	47718815	53292583	58802505	43372883	56318022	57866690	41635093	40307315	37226158
Intracellular	IGCV155	0	0	0	0	0	0	0	0	0	0	0	0	43889903	34884468	0	0	0	0	0	38285642	0	46150158	0	0	0	0	42997371	0	37142999	0
Intracellular	IGCV156	0	0	0	0	0	0	0	0	0	0	0	0	14848503	13632181	0	13850259	0	9489663	0	9004421	0	0	0	0	0	0	0	0	0	0
Intracellular	IGCV157	0	13454842	0	0	0	0	0	10832827	0	0	0	0	9584562	0	10230437	0	0	0	9705589	15016919	10050772	10044658	0	0	0	0	0	0	10152848	10138521
Intracellular	IGCV158	0	0	0	0	0	1246584	0	0	2793075	0	0	0	1586187	0	0	0	0	0	0	0	0	2006916	1450678	0	2230472	0	0	2083229	1790023	0
Intracellular	IGCV159	0	1097271667	0	0	0	0	0	1044091658	1473501395	0	1210841780	1276766445	0	1189139359	0	1233858440	1135244928	1222945836	0	0	1242503254	1236460158	1216156815	1187345431	662457683	616903350	1041767157	0	1107184929	0
Intracellular	IGCV160	0	72451680	0	0	0	0	0	0	0	0	0	97083203	0	0	99010114	0	0	0	101077760	101308212	91698340	0	0	0	0	102750520	109465236	0	86166357	0
Intracellular	IGCV161	0	77221852	0	0	0	0	0	0	0	0	0	82311600	0	72063831	70867862	0	0	68136422	71491880	0	0	73495781	72254838	90959751	0	98923690	85100975	68044145	65422559	64222471
Intracellular	IGCV162	0	41980714	0	0	46165628	0	0	25471827	30091864	0	0	0	0	0	0	0	20565234	0	22676344	0	0	0	0	0	0	0	0	0	0	0
Intracellular	IGCV163	0	34013796	0	0	0	0	0	17933666	28705268	0	15649386	14556225	0	0	17049100	0	14143358	11159404	14615400	0	14804406	0	19372466	19126156	22724418	16562288	0	21151730	0	0
Intracellular	IGCV164	0	0	0	0	0	0	0	0	0	0	15556002	0	0	0	0	0	0	0	12301749	0	0	12320005	13643599	0	6285836	9858196	13344583	12100174	0	0
Intracellular	IGCV165	0	0	0	0	0	0	0	0	0	0	0	2833723	0	0	3526915	0	0	0	3753813	0	3410651	0	0	3652346	0	0	0	0	0	0
Intracellular	IGCV166	0	0	0	0	0	0	0	0	0	0	0	0	0	4233932	0	0	3247430	0	3694446	0	0	0	0	0	3607977	0	0	0	0	4529363
Intracellular	IGCV167	0	0	3260577	0	0	0	0	0	0	0	0	0	0	3028081	1720302	0	0	0	2601517	0	2300986	2466417	0	0	0	1662868	0	0	2620896	0
Intracellular	IGCV168	0	0	3628280	0	0	0	0	0	0	0	0	4087864	0	0	0	0	0	0	2446099	0	0	3066765	0	0	0	0	0	0	0	0
Intracellular	IGCV169	0	0	0	0	0	97783815	0	0	0	0	0	0	0	0	98502653	0	0	121987764	0	0	0	89139872	0	0	0	0	108633050	97315883	114290264	0
Intracellular	IGCV170	0	0	0	0	0	0	0	0	0	0	0	0	0	0	0	0	0	25028624	0	0	0	26674189	24045803	14604615	17460648	23181082	24963693	12488393	0	26147602
Intracellular	IGCV171	0	0	0	0	0	0	0	0	0	0	0	5774692	0	17083676	8595326	0	0	0	0	0	0	14518235	0	8881428	9784751	0	0	0	14047466	11051021
Intracellular	IGCV172	0	0	27974101	0	0	0	0	26220362	0	0	0	0	0	21230868	0	0	17266062	0	0	0	0	14480270	12701942	0	0	0	0	16310674	0	0
Intracellular	IGCV173	0	0	0	0	0	0	0	0	0	0	9932961	0	0	0	0	0	0	8403084	0	0	0	4891530	10299718	8673161	9849614	9934819	0	9177297	7934639	0
Intracellular	IGCV174	0	0	0	0	0	0	0	0	0	0	0	7482996	0	0	7447123	0	0	0	0	0	0	0	0	7828859	8076706	0	9045267	0	8296176	6860997
Intracellular	IGCV175	0	0	0	0	6408437	7910516	0	0	0	0	7128054	0	0	0	0	0	0	5298254	0	0	0	0	5352983	0	6080534	0	0	0	0	5215444
Intracellular	IGCV176	0	0	0	0	0	0	0	0	0	0	0	0	0	0	0	0	0	2453947	0	0	0	0	0	0	2688947	0	0	3184719	3781027	0
Intracellular	IGCV177	0	122542129	0	0	87813043	0	0	230092478	0	0	0	0	0	71024561	0	0	127469824	0	0	0	0	0	57312216	0	0	0	0	47819078	50439244	0
Intracellular	IGCV178	0	0	0	0	8726420	0	0	0	0	0	0	0	0	12911561	0	0	9994614	0	0	0	0	0	9621644	0	0	0	0	8524974	0	0
Intracellular	IGCV179	0	0	2016866	0	2717869	0	0	0	0	0	0	2478024	0	0	0	0	4133178	0	0	0	1292176	0	0	0	0	0	0	2478420	3875376	2390609
Intracellular	IGCV180	0	2377042	0	0	1739203	1919124	0	0	0	0	0	0	0	0	0	0	0	0	0	0	0	0	0	0	0	0	0	0	0	0
Intracellular	IGCV181	0	0	0	0	99296329	106661718	0	0	0	0	0	0	0	0	93283160	0	0	0	0	0	0	0	0	0	0	0	0	0	0	0
Intracellular	IGCV182	0	0	0	0	6168050	6830278	0	0	7055789	0	0	0	0	0	0	0	0	0	0	0	0	0	0	0	0	0	2909476	0	0	0
Intracellular	IGCV183	0	0	0	0	1624180	0	0	0	0	0	0	0	0	0	0	0	0	0	0	0	0	0	0	0	0	0	0	0	0	0
Intracellular	IGCV184	0	0	0	0	0	0	0	103282515	0	0	0	86582573	0	114682839	105494801	0	0	0	0	0	93869637	0	0	0	0	0	152713952	0	89438774	0
Intracellular	IGCV185	0	0	0	0	0	0	0	7735295	9180172	0	0	5341368	0	9776409	0	0	8239665	0	0	0	0	0	0	0	0	0	0	0	0	0
Intracellular	IGCV186	0	0	0	0	0	0	0	0	0	0	78183591	0	0	92847325	0	0	0	0	0	72527812	0	0	0	0	0	0	86626817	0	0	0
Intracellular	IGCV187	0	0	0	0	0	0	0	0	0	0	11266662	11192755	0	14208217	0	0	0	0	0	0	0	0	10803035	11925292	0	0	0	0	0	9649149
Intracellular	IGCV188	0	0	0	0	0	0	0	0	0	0	0	19813340	0	23304248	0	0	0	0	0	0	18727297	0	0	0	0	0	0	0	0	0
Intracellular	IGCV189	0	0	0	0	0	0	0	0	0	0	0	0	0	10682926	0	0	0	11219645	0	0	0	0	0	8443597	0	0	10174055	0	0	0
Intracellular	IGCV190	0	0	0	0	0	0	0	0	0	0	0	0	0	0	6305948	0	6578388	0	0	0	0	0	12176738	0	0	0	0	0	5652407	0
Intracellular	IGCV191	0	0	2134880	0	0	0	0	0	0	0	0	0	0	0	0	0	0	0	0	0	0	0	0	0	0	0	0	0	2059041	0
Intracellular	IGCV192	0	0	0	0	0	0	0	0	0	0	0	0	0	0	0	0	0	0	0	0	0	0	0	0	0	0	964555139	0	0	0
Intracellular	IGCV193	0	0	13967767	0	0	0	0	0	0	0	0	0	0	0	0	0	0	0	0	0	0	0	0	0	0	0	0	0	0	0
Extracellular	EGCV1	8.84989	8.84947	8.84702	8.85294	8.82919	8.8433	8.86474	8.85116	8.83132	8.85903	8.84871	8.87209	8.86752	8.84954	8.85264	8.85038	8.85532	8.85678	8.8383	8.8431	8.84587	8.83053	8.86382	8.84531	8.86407	8.85084	8.80588	8.85554	8.8003	8.86894
Extracellular	EGCV2	8.73451	8.75926	8.6143	8.74594	8.77585	8.76409	8.71687	8.75435	8.74661	8.57887	8.69759	8.76166	8.77993	8.56543	8.65778	8.72563	8.42393	8.66422	8.71958	8.67284	8.57747	8.67356	8.53255	8.73748	8.71552	8.71073	8.69676	8.67072	8.68125	8.74444
Extracellular	EGCV3	8.73373	8.75188	0	0	8.7702	8.76237	8.74474	8.80003	8.77911	0	8.67693	8.8144	8.76277	0	0	8.78126	0	8.73721	0	0	0	8.74737	0	0	0	8.73021	0	0	0	8.7721
Extracellular	EGCV4	8.6719	8.67906	8.62841	8.68782	8.70007	8.69096	8.69107	8.71167	8.69814	8.60034	8.6276	8.69968	8.68927	8.50534	8.58469	8.5979	8.48883	8.55505	8.63611	8.62139	8.6348	8.62649	8.57921	8.66005	8.66016	8.64374	8.63982	8.62307	8.62734	8.68981
Extracellular	EGCV5	8.67128	8.67451	8.66896	8.76142	8.65194	8.74172	8.64973	8.71483	8.626	8.73849	8.64803	8.74403	8.78769	8.61901	0	8.61102	8.71052	8.61397	8.51862	0	8.6679	8.57513	8.65165	8.68326	8.66939	8.67575	8.66917	8.685	8.85148	8.73078
Extracellular	EGCV6	8.55897	8.6471	8.57226	8.54802	8.54776	8.60681	8.55035	8.64367	8.54767	8.59315	8.55796	8.57985	8.6046	8.5532	8.57274	8.57341	8.58057	8.55587	8.54843	8.56	8.54034	8.53797	8.69621	8.61062	8.5765	8.57065	8.53089	8.55617	8.6066	8.57773
Extracellular	EGCV7	8.5736	8.53346	0	8.54275	8.62355	8.62053	8.56485	8.56286	8.58789	0	8.53106	8.63893	8.64715	0	8.46085	8.56723	0	8.52912	8.55296	8.53291	8.46159	8.5305	0	8.53774	8.54254	8.56055	8.55183	8.46801	8.46881	8.61915
Extracellular	EGCV8	8.53076	8.5432	8.54675	8.55388	8.54676	8.53938	8.54465	8.56852	8.53415	8.5477	8.52468	8.55589	8.55921	8.53993	8.55213	8.5467	8.53251	8.53687	8.50807	8.52474	8.52827	8.53877	8.54086	8.5575	8.53871	8.53454	8.54095	8.54931	8.55194	8.53983
Extracellular	EGCV9	8.45067	8.38948	8.20643	8.34472	8.51315	8.57385	8.3498	8.47062	8.55081	0	8.31924	8.52087	8.52129	8.33387	8.2026	8.60192	8.12936	8.36246	8.55189	8.45212	8.3417	8.48998	8.15604	8.42154	8.48797	8.53026	8.51941	8.29173	8.33786	8.55806
Extracellular	EGCV10	8.41801	8.4358	8.19722	8.42777	0	0	8.43742	8.45773	0	8.34658	8.3285	0	0	7.88442	8.3236	8.29917	8.15403	8.33561	8.30793	8.2759	8.31282	8.19132	8.00743	8.41406	8.40575	8.31753	8.2735	8.35319	8.28496	0
Extracellular	EGCV11	8.41592	8.49752	8.21448	8.40856	8.42895	8.4832	8.39841	8.51564	8.44358	8.21655	8.35347	8.53005	8.52024	8.01685	8.27222	8.36477	8.00765	8.30756	8.35169	8.32251	8.29219	8.31247	8.13937	8.39525	8.3848	8.35655	8.29543	8.30855	8.24138	8.47092
Extracellular	EGCV12	8.41384	8.46784	8.16836	8.37392	8.48955	8.38305	8.44965	8.37289	8.42726	7.99673	8.42207	8.50703	8.36568	8.28108	8.34677	8.4141	8.11764	8.30496	8.35043	8.1862	8.30862	8.25644	8.09971	8.42035	8.43584	8.3766	0	8.18714	8.08952	8.45028
Extracellular	EGCV13	8.37123	8.35375	8.10762	8.34216	8.48928	8.46097	8.32558	8.41674	8.42939	8.25407	8.25382	8.49834	8.47278	8.07852	8.18844	8.35516	8.02242	8.25968	8.34908	8.24618	8.23933	8.25747	7.91906	8.32018	8.33725	8.31776	8.31966	8.22884	8.23557	8.41836
Extracellular	EGCV14	8.34878	0	8.25319	0	0	0	8.32789	8.37925	0	0	8.296	0	0	8.15231	0	0	0	8.27124	0	0	0	0	8.1497	0	8.39298	0	0	0	0	0
Extracellular	EGCV15	8.34657	8.33126	8.285	0	8.34169	8.2941	0	0	8.35131	0	0	0	8.19044	0	0	0	0	0	0	0	0	0	0	0	0	0	0	0	0	0
Extracellular	EGCV16	8.31615	8.32234	8.28466	8.31904	8.37305	8.37055	8.311	8.36783	8.35048	8.27009	8.28703	8.36057	8.38406	8.24074	8.31061	8.32101	8.24242	8.27779	8.30771	8.27326	8.29395	8.28061	8.24715	8.32277	8.32571	8.3007	8.29628	8.31534	8.30444	8.35529
Extracellular	EGCV17	8.29054	8.19817	7.82218	8.09948	8.43378	8.29733	0	0	0	7.67674	7.94191	8.23782	8.42704	0	8.00254	8.16214	0	8.038	8.10964	7.97598	7.72941	8.1008	7.82404	7.96581	8.1572	8.06598	8.24823	7.91	7.63089	8.31754
Extracellular	EGCV18	8.2121	8.2478	0	8.11534	8.29504	8.235	8.00936	8.1775	7.85885	0	0	0	8.39312	0	0	0	0	0	0	0	0	8.25613	0	0	0	0	8.24851	0	0	8.40225
Extracellular	EGCV19	8.24792	8.24227	8.09895	7.93155	8.13683	8.5378	7.9477	8.02671	7.98603	8.54272	8.39173	8.00976	7.96898	8.11135	7.94842	8.04819	7.94602	8.00572	8.22004	8.30869	8.10261	8.12434	7.91082	7.94721	7.92717	8.06549	8.0947	8.33736	7.90701	7.9536
Extracellular	EGCV20	8.24562	8.29962	8.15601	8.05561	8.24495	8.42402	8.06021	8.19158	8.08592	8.4412	8.29926	8.1104	8.11473	8.12144	8.09858	8.08932	7.99867	8.06755	8.26089	8.26863	8.1817	8.13139	8.02591	8.05907	8.0554	8.17388	8.18252	8.35473	8.05993	8.02576
Extracellular	EGCV21	8.23526	8.17808	7.99717	8.15631	8.28653	8.37725	8.08522	8.31452	8.3408	7.93657	7.79419	8.06665	8.23007	7.49277	7.81487	8.05406	7.54568	8.17597	8.20018	8.21139	7.77626	8.29184	7.92672	7.75306	8.24421	8.03166	8.30348	7.98055	7.85981	8.29871
Extracellular	EGCV22	8.22696	8.15078	8.13322	8.12135	8.24238	8.15438	8.18025	8.2374	8.17958	8.04489	8.16845	8.14934	8.15663	8.14994	8.05468	8.21998	7.98618	8.16701	8.24417	8.27025	8.11246	8.21871	8.14348	8.13494	8.1721	8.19332	8.19388	8.08304	7.77375	8.1508
Extracellular	EGCV23	8.22516	8.26356	7.99534	8.28266	8.30777	8.11822	8.25777	8.30122	8.25771	8.15487	8.18927	8.34255	8.34614	8.11465	8.16618	8.2502	7.98077	8.16094	8.26903	8.16246	8.18711	8.17781	8.03026	8.24863	8.27733	8.24717	8.24029	8.12984	8.14527	8.30533
Extracellular	EGCV24	8.20527	8.23054	0	8.23774	0	0	8.2295	8.23172	8.22545	0	8.20361	0	0	0	8.22553	8.23154	0	8.21832	8.20599	8.20811	8.21138	8.20365	0	8.22717	8.22863	8.22032	8.21866	0	8.21753	0
Extracellular	EGCV25	8.17271	8.16706	7.90746	8.12832	8.30157	8.36594	8.08578	8.22358	8.31223	7.99207	8.01124	8.27136	8.27736	7.82064	8.03041	8.16288	7.80755	8.10836	8.15456	8.10952	7.99695	8.16765	7.82923	8.0315	8.18223	8.08097	8.2065	7.96243	7.92189	8.26152
Extracellular	EGCV26	8.14239	8.11789	8.02131	8.11267	8.18462	8.15394	8.12509	8.17314	8.14366	0	8.09952	8.17681	8.17738	8.01309	8.08273	8.14246	7.90401	8.10176	8.12183	8.10779	8.03185	8.10823	7.99325	8.13415	8.12432	8.09607	8.13104	8.02145	8.04169	8.15675
Extracellular	EGCV27	8.1494	8.10857	8.15527	8.12183	8.07166	8.11438	8.12969	8.11938	8.07303	8.12187	8.14674	8.07099	8.06328	8.13282	8.10529	8.14786	8.075	8.13628	8.13069	8.20852	8.10017	8.17166	8.1501	8.08797	8.12833	8.15552	8.2049	8.09442	8.05384	8.10022
Extracellular	EGCV28	8.15798	8.13399	7.90992	8.18294	8.05042	8.41147	8.03166	8.21653	8.33804	0	0	8.10314	8.16728	0	0	8.0682	0	8.17687	8.10969	8.07822	7.84784	8.24112	0	0	8.26112	8.00309	0	0	0	8.2634
Extracellular	EGCV29	8.14522	8.28845	7.89411	0	0	0	8.10878	0	0	7.89403	0	0	0	7.41334	0	0	0	7.7623	8.01712	0	7.80045	7.94873	0	8.31608	8.02398	8.02027	0	0	0	0
Extracellular	EGCV30	8.13044	8.0988	7.82223	7.99376	8.23436	8.27812	8.01933	8.23023	8.28822	7.77464	7.74101	8.0465	8.12449	7.4941	7.67976	8.03356	7.43784	8.02802	8.11847	8.08898	7.73267	8.16583	7.75047	7.70645	8.11333	7.96793	8.10352	7.81245	7.66949	8.1761
Extracellular	EGCV31	7.98295	7.97631	0	0	8.12121	8.03988	7.82655	8.01483	8.01783	0	0	7.96776	7.97624	0	0	7.88699	0	7.92787	0	0	0	7.87577	0	0	0	8.02402	0	0	0	7.99963
Extracellular	EGCV32	7.90008	7.89872	7.49209	7.85801	8.18754	7.93677	7.97893	8.02379	8.08244	0	7.56619	7.88392	8.00747	0	7.57395	7.4792	0	7.41829	7.61191	7.54509	7.48294	7.59534	7.4141	7.62285	7.79017	7.71498	7.85897	7.57563	7.46356	7.90881
Extracellular	EGCV33	7.88976	7.80501	7.4825	7.76818	7.88102	8.16825	7.65551	8.03625	7.935	0	0	7.55918	7.99595	0	7.30725	0	0	7.83206	7.80641	7.72543	0	7.85491	7.49163	0	0	0	0	0	0	8.00648
Extracellular	EGCV34	7.89328	7.72495	7.68951	7.69765	7.99254	7.80439	7.78338	7.89942	7.84634	0	7.69658	7.9225	7.93382	7.48839	0	7.77396	7.75591	7.74246	7.52416	7.73324	7.50456	7.47825	7.69323	7.61731	7.72341	7.66196	0	7.59364	7.75282	7.94175
Extracellular	EGCV35	7.87576	7.79971	7.78941	7.8175	7.85482	7.82533	7.81599	7.83089	7.78886	7.80861	7.8503	7.80538	7.79269	7.7931	7.76786	7.79471	7.73129	7.8166	7.85948	7.87288	7.81219	7.85856	7.81933	7.73076	7.78833	7.84312	7.86009	7.76741	7.75753	7.84865
Extracellular	EGCV36	7.8636	7.94052	7.59491	7.69546	8.12753	7.85344	7.77284	8.09437	7.93271	0	7.61275	8.01886	7.72373	0	0	7.77449	0	7.70924	7.56394	7.82629	7.45552	7.86457	0	7.68699	7.55371	7.59816	0	7.59066	0	7.96398
Extracellular	EGCV37	7.84517	7.97785	7.60038	7.82149	8.05052	7.86835	7.81459	7.98939	7.94571	7.60048	7.68996	8.01119	8.04561	7.48363	7.69199	7.80692	7.49677	7.64088	7.70972	7.63543	7.64645	7.72265	7.47697	7.81976	7.80892	7.76161	7.74034	7.69768	7.80194	7.89022
Extracellular	EGCV38	7.83542	7.76661	7.8094	7.78672	7.82194	7.81795	7.74093	7.7818	7.7975	7.83186	7.76564	7.77756	7.7979	7.75212	7.75648	7.81629	7.72589	7.80693	7.82125	7.84374	7.75861	7.81023	7.7977	7.74169	7.77513	7.82011	7.78438	7.75126	7.75077	7.78931
Extracellular	EGCV39	7.77213	7.54143	7.45279	7.68976	7.87746	7.81882	7.65978	0	7.80713	0	7.55891	7.94135	7.95	7.29477	7.48873	7.681	7.19087	7.55794	7.6412	7.48106	7.46611	7.56682	7.1952	7.63535	7.62417	7.591	7.6222	7.50104	0	7.81007
Extracellular	EGCV40	7.73276	7.71535	7.71053	7.72256	7.74035	7.74262	7.66971	7.7011	7.71192	7.74151	7.74239	7.70055	7.73712	7.67991	7.70048	7.72961	7.70297	7.70851	7.75531	7.77836	7.72459	7.69067	7.72574	7.66546	7.74592	7.75621	7.78594	7.6652	7.70377	7.71267
Extracellular	EGCV41	7.73136	7.6981	7.67079	7.57796	7.7883	7.6693	7.69651	7.67742	7.8753	0	7.63969	7.69641	0	7.62123	7.54251	7.87151	7.58677	7.69964	7.8953	7.91531	7.7454	7.93069	7.61075	7.53494	7.77204	7.79538	7.79476	7.43736	0	7.6259
Extracellular	EGCV42	7.65836	7.6372	7.5871	7.6011	7.63358	7.66348	7.61455	7.64635	7.61812	7.66097	7.65491	7.63516	7.60815	7.58275	7.61074	7.61953	7.56819	7.58997	7.70687	7.68163	7.60583	7.65253	7.57991	7.57711	7.63231	7.66276	7.63557	7.57883	7.6105	7.6353
Extracellular	EGCV43	7.73837	7.6819	0	7.65418	7.82973	7.80933	7.67355	7.81478	7.76923	0	7.59176	7.84109	7.8772	7.57719	7.58845	7.89194	7.57167	7.77853	7.82107	7.67137	7.60157	7.72419	0	7.64777	7.72211	7.74122	7.68465	7.64723	7.65788	7.86466
Extracellular	EGCV44	7.68637	7.71396	7.40505	7.58178	7.90335	7.82525	7.65687	7.72429	7.8747	0	7.54218	7.88463	7.67482	7.42304	7.52516	7.7423	7.34696	7.50929	7.63748	7.55148	7.46305	7.6562	7.32211	7.55755	7.74245	7.67047	7.75313	7.35176	7.37946	7.70432
Extracellular	EGCV45	7.66057	7.67607	7.61208	7.57284	0	7.75215	7.58208	7.70963	7.68606	0	7.62069	7.60652	7.95062	7.47149	7.47036	7.70938	7.44472	7.58221	7.70583	0	7.59538	7.71618	7.57933	7.58282	7.63271	7.67131	0	7.48792	0	7.76654
Extracellular	EGCV46	7.64815	7.61981	7.26542	7.49561	7.87953	7.77964	7.53859	7.68158	7.63585	7.48972	7.47383	7.69106	7.75947	7.34227	7.37758	7.48882	7.17664	7.33586	7.50753	7.43167	7.29118	7.36964	7.15166	7.37157	7.53115	7.54046	7.54806	7.36122	7.3145	7.68103
Extracellular	EGCV47	7.6412	7.56706	7.31036	7.5549	7.73322	7.79588	7.5098	7.57805	7.62129	0	7.47194	7.73514	7.72099	0	7.4202	7.4466	0	7.42836	7.52044	0	7.40836	0	0	7.46131	7.49041	7.42264	0	7.41167	0	7.57335
Extracellular	EGCV48	7.62533	7.57215	7.40116	7.63184	7.67518	7.95605	7.42981	7.75707	7.91591	0	0	7.4757	7.80511	0	0	7.51879	0	7.68451	7.5765	7.54794	0	7.79922	7.4188	7.22863	7.74264	7.43337	7.81626	7.51804	7.46951	7.84148
Extracellular	EGCV49	7.59348	7.58309	7.53902	7.59628	7.66238	7.67992	7.65874	7.53285	7.6061	7.60707	7.60442	7.59592	7.54248	7.65354	7.67796	7.54077	7.61591	7.57287	7.54716	7.52701	7.54316	7.56116	7.54449	7.55072	7.58224	7.54806	7.59494	7.5961	7.51127	7.50833
Extracellular	EGCV50	7.61407	7.57991	0	7.57897	7.77049	7.81518	7.50036	7.6374	7.74106	0	7.44852	7.67585	7.70281	0	7.49259	7.61485	0	7.47079	0	0	0	0	7.31273	0	7.59675	7.53847	7.64131	0	0	7.66437
Extracellular	EGCV51	7.58404	0	7.68667	7.34478	0	0	7.32871	7.68991	0	0	7.27886	0	0	7.30819	7.20452	7.55959	7.30094	0	7.25203	7.53786	7.44811	7.59662	7.10963	7.30109	7.2623	7.36094	7.55708	0	0	0
Extracellular	EGCV52	7.55198	7.85049	7.5977	7.77752	7.95344	7.93254	7.8001	7.94227	7.85938	0	7.61349	7.91434	7.92936	0	7.49097	7.83485	0	7.71772	7.53834	7.72726	7.53012	7.44629	0	7.79128	7.81352	7.80775	7.77437	7.48665	0	7.85631
Extracellular	EGCV53	7.52629	7.54894	0	0	0	0	0	7.53801	7.55953	0	0	0	0	0	0	0	0	0	0	0	0	0	0	0	7.58728	0	0	0	0	0
Extracellular	EGCV54	7.47561	7.55786	7.58576	7.36371	7.4677	7.41626	7.49038	0	7.55368	0	7.37081	0	0	7.45254	0	7.42708	7.25591	7.39977	7.49855	7.53234	7.38429	7.44929	7.26032	0	7.40194	7.41129	7.4495	0	0	0
Extracellular	EGCV55	7.4813	7.38766	7.40273	7.41524	7.44193	7.46996	7.41598	7.44159	7.42662	7.45351	7.4481	7.40938	7.42303	7.44299	7.35484	7.46214	7.37906	7.42148	7.48237	7.49069	7.41802	7.42019	7.35853	7.3479	7.44255	7.48527	7.50055	7.38229	7.38462	7.38644
Extracellular	EGCV56	7.51315	7.50994	0	7.45259	0	0	0	0	0	0	0	0	0	0	0	0	0	0	0	0	0	0	0	0	0	0	0	0	0	0
Extracellular	EGCV57	7.45733	7.28978	7.38115	7.328	0	0	7.40224	7.28964	7.39073	0	7.37332	7.35491	7.3927	7.60853	0	7.45513	0	7.35909	0	0	7.26722	0	7.42328	0	7.47744	7.41434	0	7.29018	7.36783	7.42429
Extracellular	EGCV58	7.46242	7.66766	7.23202	7.04119	7.87725	0	7.56281	7.23328	7.52099	0	7.54865	7.86818	0	7.51046	0	7.75475	0	0	7.6147	7.31765	7.53486	0	0	7.51425	7.42484	7.67629	0	0	0	0
Extracellular	EGCV59	7.44859	7.67585	7.15095	0	7.92716	0	7.59126	7.20234	7.49133	0	7.56159	7.8954	0	7.51992	0	7.75874	7.35663	0	7.68522	0	7.58047	0	0	7.52262	7.29412	7.68734	0	0	0	0
Extracellular	EGCV60	7.40336	7.37524	7.38375	7.38794	7.41733	7.42881	7.37668	7.35522	7.34949	7.51376	7.41225	7.3819	7.3722	7.37397	7.33914	7.40562	7.40133	7.40065	7.41193	7.45351	7.37156	7.44443	7.33362	7.3212	7.40481	7.42519	7.46793	7.35478	7.36512	7.35401
Extracellular	EGCV61	7.32635	0	0	0	7.73198	0	7.35169	7.71043	7.81191	0	0	0	7.3652	0	0	0	0	0	7.56399	7.58634	0	7.76976	7.17642	0	7.45757	7.37802	7.62447	0	0	7.71858
Extracellular	EGCV62	7.2928	7.24626	7.18708	0	7.34611	0	7.29268	7.29114	7.33612	0	7.16182	0	0	0	0	7.33108	0	7.25451	7.32862	7.3507	7.16084	7.32901	7.1827	7.1311	7.25337	7.28312	7.30626	0	0	0
Extracellular	EGCV63	7.33045	7.20086	7.25341	7.24185	0	0	7.18958	7.23511	7.25527	0	7.26504	7.20689	7.34062	0	0	7.25728	0	7.28097	0	7.30996	7.21269	0	0	7.19362	0	7.28338	0	7.21651	7.30644	7.3208
Extracellular	EGCV64	7.29101	7.22846	7.20463	0	0	0	7.23998	7.24896	7.38954	0	7.18348	7.16361	0	0	7.13854	7.37338	0	7.27489	7.35446	7.43001	0	7.38216	7.23129	7.08688	7.32003	0	0	0	0	7.23003
Extracellular	EGCV65	7.23851	7.02991	7.12098	7.02718	7.19406	7.17829	7.11701	7.13844	7.17583	0	7.2311	7.14012	7.18578	7.06579	7.10271	7.14566	7.08416	7.16986	7.224	7.30803	7.04448	7.26872	7.15363	7.1333	7.15018	7.20409	7.29512	0	7.145	7.20558
Extracellular	EGCV66	7.25989	7.39704	7.29726	7.21881	0	0	0	7.24606	7.40948	0	7.27991	7.39353	0	7.3899	0	7.43639	7.38249	7.10758	7.3875	7.30135	7.27473	7.19231	0	7.15528	7.38428	7.35744	0	7.12031	0	0
Extracellular	EGCV67	7.23982	7.43307	6.92987	6.83292	7.55536	0	7.31159	7.06068	7.31484	0	7.29383	7.55944	0	7.19241	0	7.50035	7.01465	0	7.36894	7.12052	7.28923	0	0	7.2818	7.09027	7.42344	0	0	0	0
Extracellular	EGCV68	7.25343	7.30181	7.08378	7.29161	7.47183	7.48891	7.24376	7.36457	7.45033	7.26763	7.16178	7.49299	7.54627	6.94109	7.09667	7.31926	6.78823	7.19078	7.40964	7.3133	7.24911	7.27004	6.95389	7.32635	7.29577	7.25561	7.34622	7.20636	7.16269	7.41542
Extracellular	EGCV69	7.22774	7.16909	7.08657	7.18515	0	0	0	0	7.17523	0	7.18817	7.18714	0	7.23673	0	7.18054	0	7.14218	7.08652	7.07631	7.15628	7.09296	0	7.08115	0	7.20295	0	7.09609	0	7.15592
Extracellular	EGCV70	7.22735	0	0	0	7.3843	0	0	0	0	0	0	0	0	0	0	0	0	0	0	0	0	0	0	0	0	0	0	0	0	0
Extracellular	EGCV71	7.19003	0	0	0	0	0	0	0	0	0	0	0	0	0	0	0	0	0	7.17089	0	0	7.1796	0	0	0	0	0	0	0	7.18626
Extracellular	EGCV72	7.17073	6.93991	7.19263	7.05068	7.04835	7.38749	7.04937	7.09148	7.1385	7.39667	7.23371	7.11941	7.03715	7.0971	7.01323	7.12032	7.00145	7.12483	7.23529	7.28638	7.05809	7.21677	7.06329	7.10122	7.06603	7.14021	7.21975	6.98651	7.1046	7.16247
Extracellular	EGCV73	7.15951	7.10386	6.84622	7.07279	7.48274	7.26476	7.00167	7.30078	7.24232	0	6.91772	7.28234	7.20673	0	0	7.24271	0	7.04216	7.2881	7.21633	6.87914	7.37638	0	7.02217	7.08838	7.17904	0	6.84398	0	7.28236
Extracellular	EGCV74	7.14902	7.04505	0	6.98403	7.33491	7.09357	7.03218	7.27988	6.82048	6.80655	7.13241	6.99903	7.38826	6.98274	6.92924	0	7.03214	6.92608	0	0	0	7.15748	7.24016	7.25917	6.89768	7.22345	6.81821	6.8722	7.35468	7.26443
Extracellular	EGCV75	7.17069	7.22842	6.85867	7.0568	7.39001	7.34578	7.1083	7.30567	7.28378	0	7.09372	7.4096	7.21224	6.76625	6.87281	6.99242	6.72839	6.84404	7.18285	7.03566	6.98125	7.10748	6.81913	7.15766	7.19741	7.16356	7.27955	7.04994	7.05575	7.27139
Extracellular	EGCV76	7.09366	0	0	0	7.15274	7.15193	7.11052	0	0	7.07957	0	0	0	7.41138	0	0	0	0	0	0	0	0	0	0	0	0	0	0	0	0
Extracellular	EGCV77	7.04689	0	6.94443	6.93621	0	7.01859	7.01999	0	7.0432	0	0	7.05845	7.03819	0	0	0	7.03611	6.99672	6.87603	0	6.86525	6.90665	6.98548	6.92291	7.03248	0	0	6.87972	0	7.04676
Extracellular	EGCV78	7.08095	6.98146	7.00955	6.94113	7.15391	7.07531	7.06738	7.00047	7.15253	0	6.97131	7.01081	6.91959	0	6.99595	0	0	7.06562	0	0	0	0	6.98493	6.83192	7.10186	0	7.15738	6.84881	6.85123	6.9908
Extracellular	EGCV79	6.96394	6.86415	6.84302	6.94511	7.01703	0	6.96065	6.91926	6.96618	0	6.88033	6.9781	7.06996	7.04127	6.95602	6.9412	0	6.84205	6.91571	6.89668	6.91108	6.8642	0	6.85471	6.92529	6.99299	6.93697	6.81749	6.87232	7.00943
Extracellular	EGCV80	6.91096	6.96263	6.80809	6.85402	6.98601	7.06328	6.93158	6.99074	7.05143	0	6.81462	6.90807	6.91941	6.69028	0	6.8754	6.64586	6.87345	6.952	7.00922	7.21784	7.43009	6.91716	6.81661	6.74961	6.90963	8.12644	6.76579	0	6.93799
Extracellular	EGCV81	6.85078	6.73142	6.73793	6.85242	6.87922	6.79194	6.84032	6.78061	6.79846	0	6.81276	6.81387	6.83142	6.73425	6.9646	6.79736	6.76889	6.81424	6.69337	6.72595	6.73758	6.70259	6.82307	6.68103	6.83879	6.81887	6.94728	6.75942	6.79967	6.81888
Extracellular	EGCV82	6.81023	6.75055	6.7356	6.67649	6.8188	6.70399	6.8061	6.79583	6.77654	0	6.73994	6.75672	6.65611	6.70363	6.61342	0	6.58162	0	6.79519	6.82397	6.7047	6.81446	6.72404	6.70372	6.74415	6.78825	6.77612	6.64211	0	6.69818
Extracellular	EGCV83	6.85819	6.76117	6.76848	6.74359	0	6.82676	0	6.70621	0	0	0	0	6.72294	0	6.79307	0	6.72031	6.78895	6.76408	6.8551	6.74466	6.79962	0	0	0	0	0	6.66711	0	0
Extracellular	EGCV84	6.86349	6.96151	6.54593	6.84424	0	7.05164	6.67767	6.88685	6.88853	0	6.81567	0	0	6.74132	6.46415	6.75778	0	6.7109	7.06638	6.84336	6.76105	6.74665	6.43616	6.73995	6.85805	6.69129	6.90792	6.70234	6.63729	6.80371
Extracellular	EGCV85	6.83543	6.77695	6.7946	6.75931	6.84805	6.80653	6.82505	0	6.90159	0	6.74537	0	6.68523	6.97334	6.66446	6.88106	6.71394	0	6.83322	6.92743	6.77406	6.87845	6.76819	0	6.77531	0	6.87642	0	0	0
Extracellular	EGCV86	6.77831	6.52184	6.58212	6.68629	6.85237	6.69444	6.77223	6.73042	6.66723	6.92969	6.66002	6.7982	6.73328	6.66976	6.90623	6.65705	6.78234	6.70941	0	0	6.5543	6.532	6.72497	6.63506	6.71744	6.69128	6.76994	6.57731	6.69335	6.73834
Extracellular	EGCV87	6.80212	0	6.78683	0	0	0	6.78906	6.92438	6.91784	0	0	7.01707	0	0	0	0	0	0	6.70789	6.64997	6.6493	0	0	0	0	6.73454	0	6.65568	6.71698	6.94098
Extracellular	EGCV88	7.10855	6.99441	7.04092	7.00494	7.0221	6.98026	0	7.1144	0	0	7.03556	6.99077	7.10315	6.8909	0	7.03157	0	7.08851	7.06571	0	6.99574	7.06289	0	7.01368	0	7.01627	0	7.0282	7.06314	7.10869
Extracellular	EGCV89	6.78592	6.75642	6.82803	6.75295	6.85074	6.70604	6.89402	6.78732	6.83224	0	6.75415	6.79182	6.50743	6.55954	6.59248	7.00338	6.6251	6.51623	6.85426	6.92987	6.82694	6.8345	6.75219	6.81466	6.83039	6.85211	6.80656	6.56056	0	6.73625
Extracellular	EGCV90	6.78475	6.70195	6.68863	6.61028	6.8264	0	6.72265	6.72301	6.82913	0	0	6.68917	6.60117	6.8498	6.5597	6.84854	0	6.72568	6.7941	6.88207	6.668	6.81834	6.68854	6.61776	6.77745	6.82788	0	6.50103	0	6.75345
Extracellular	EGCV91	6.76196	6.76572	6.43641	6.66727	6.84306	6.79927	6.72648	6.71494	6.84289	0	6.56438	6.75966	6.79315	6.36257	6.48624	6.81813	6.28944	6.61964	6.708	6.50345	6.53709	6.49348	6.27022	6.59105	0	6.72306	6.71579	6.55526	0	6.82915
Extracellular	EGCV92	6.66956	6.67555	6.75356	6.58156	0	6.65929	6.66171	6.71681	6.89055	0	6.60821	0	0	6.78276	0	7.02536	6.68774	6.6982	0	0	6.87016	0	6.68827	0	6.93073	6.99131	6.97544	6.4782	0	6.64119
Extracellular	EGCV93	6.65765	0	6.65493	0	6.62762	0	6.52786	0	6.56693	0	6.59232	6.54995	6.58625	6.54243	6.52385	6.58341	6.51839	6.56049	6.6093	6.59144	6.52884	6.58732	6.52416	6.51744	6.5809	6.59459	6.62095	0	6.51201	6.57075
Extracellular	EGCV94	6.65782	0	6.63084	0	6.61471	0	6.55128	6.61487	6.57516	0	6.59554	6.58233	6.57563	6.56486	6.5554	6.59243	6.5552	6.57535	6.63785	6.6217	6.55259	6.62291	6.55247	6.54148	6.55166	6.63449	6.64497	6.51597	6.52817	6.53355
Extracellular	EGCV95	6.54155	6.50425	6.28508	6.46779	6.52038	6.41958	6.57825	6.61096	6.53334	0	0	6.40197	0	0	0	6.15911	5.87507	6.12602	6.43985	6.39081	0	6.35691	0	6.26549	6.41914	0	6.38237	6.24575	6.10045	6.40942
Extracellular	EGCV96	6.57102	6.34878	6.12587	0	6.71595	0	6.29373	0	6.50631	0	6.27851	0	0	0	0	0	0	0	0	0	6.09526	6.48426	0	6.37017	6.32456	6.45564	0	0	0	6.68781
Extracellular	EGCV97	6.5551	6.46259	6.47556	6.50769	6.54968	0	6.50719	0	6.50149	6.57473	6.52304	0	6.49096	6.76693	6.58989	6.55458	6.59251	6.49668	6.35193	0	6.4236	6.3982	6.49192	6.39974	6.5557	6.48474	6.57525	6.44923	6.47987	6.47577
Extracellular	EGCV98	6.50638	6.46942	6.41693	6.36463	0	0	0	0	0	0	6.41613	0	0	0	0	6.52759	6.29948	0	0	6.53733	0	6.48861	0	0	0	0	0	0	0	0
Extracellular	EGCV99	6.50482	6.38657	6.45912	6.42576	6.49056	0	6.41027	6.47559	6.46265	0	6.46366	6.43527	6.43816	0	6.39189	6.46689	6.3995	6.43054	6.47228	6.5176	6.42766	6.44339	6.41042	6.36042	6.43781	6.50363	6.48211	6.38605	6.40376	6.43126
Extracellular	EGCV100	6.44728	6.42259	6.12752	0	6.74019	6.47587	6.36582	6.49365	6.52803	0	6.31668	6.61741	6.68219	0	0	6.32662	0	6.2075	6.35045	6.05936	0	6.22313	0	0	0	6.37447	6.31981	0	0	6.59251
Extracellular	EGCV101	6.38117	0	0	0	6.30535	0	6.25614	0	6.22794	0	6.19991	6.23458	6.23685	0	6.24794	6.23241	6.21025	6.24695	6.27755	0	0	6.27278	0	6.19913	6.22209	0	6.29703	0	6.182	6.2117
Extracellular	EGCV102	6.43317	6.28694	6.20688	6.30934	6.53922	6.39518	6.41378	0	6.36921	6.39536	6.30739	6.4032	6.46539	0	0	6.30918	6.27996	6.24842	6.29025	6.26363	6.22623	6.22245	0	6.34103	6.35832	0	6.56102	0	6.16677	0
Extracellular	EGCV103	6.41332	0	0	6.48446	0	0	0	0	6.47774	0	0	0	6.66411	0	0	0	0	0	0	0	0	0	0	6.51192	0	0	0	0	0	6.61495
Extracellular	EGCV104	6.3971	6.44792	0	0	0	0	6.35665	6.53136	6.53583	0	0	6.6618	0	0	0	0	0	0	0	0	0	0	0	0	0	0	0	0	0	6.52531
Extracellular	EGCV105	6.3993	6.4554	0	0	0	0	6.37746	0	0	0	0	6.61792	0	0	0	0	0	0	0	6.34639	0	6.40765	0	0	6.40583	0	0	0	0	0
Extracellular	EGCV106	6.37581	0	6.26672	0	0	0	0	0	0	6.40436	6.30744	0	0	0	6.29772	0	6.24312	6.30528	0	0	6.25991	6.31939	6.25459	0	0	6.31692	0	0	0	0
Extracellular	EGCV107	6.33697	0	6.18361	0	0	0	0	0	0	0	0	0	0	0	6.13783	0	5.98829	6.19943	0	6.259	6.13036	6.27603	6.11269	0	0	0	0	6.04627	0	0
Extracellular	EGCV108	6.31728	6.38038	6.34712	0	0	0	0	0	0	0	0	0	0	6.54658	6.20428	6.4766	0	0	6.49823	6.50027	6.38401	6.4561	6.22471	0	6.37732	0	6.43959	0	0	0
Extracellular	EGCV109	6.32044	0	0	6.31885	0	0	0	0	0	0	0	0	6.31165	0	0	0	0	0	0	0	0	0	0	0	0	0	0	0	0	0
Extracellular	EGCV110	6.30862	6.47372	6.11424	6.19421	6.52429	6.54307	6.22148	6.3497	6.3878	0	6.2944	0	0	6.24463	6.01458	6.32526	5.90184	6.16623	6.35677	6.21062	6.23172	6.30427	5.90403	6.28857	6.26889	6.31414	6.25774	6.10059	5.86741	6.3448
Extracellular	EGCV111	6.27823	6.17621	5.96669	5.96932	0	0	6.06821	6.2086	0	0	6.10525	0	6.34816	0	0	0	0	0	0	0	6.01503	0	0	6.14075	0	0	0	5.9334	0	0
Extracellular	EGCV112	6.27307	6.27095	6.37166	6.09563	6.2183	0	6.1555	6.16223	6.21833	0	6.2749	6.09565	0	0	6.07726	6.40525	6.18002	6.24602	6.3596	6.43708	6.34539	6.33069	0	6.23281	6.38092	6.36926	6.41278	6.1811	6.07749	6.22303
Extracellular	EGCV113	6.26669	0	0	6.13922	6.12529	6.15516	0	0	6.0332	6.30397	6.15362	0	6.25548	0	0	0	0	0	0	0	0	0	0	0	0	0	6.0847	0	0	0
Extracellular	EGCV114	6.22536	6.12903	5.97121	6.13939	6.5165	0	6.31324	6.51515	6.34784	0	5.81921	6.22211	6.12285	5.65323	0	6.02632	0	5.7545	6.05804	6.03669	5.87049	6.00079	0	5.84255	6.20506	0	6.18654	5.69309	5.84779	6.36503
Extracellular	EGCV115	6.1961	6.27069	0	6.18708	6.39262	0	6.09991	6.27647	6.26009	0	0	0	0	6.23314	6.34121	0	0	0	6.44721	6.3552	6.36897	6.46406	0	0	0	0	6.51467	6.53235	0	0
Extracellular	EGCV116	6.1988	6.17244	6.0375	0	6.19423	0	6.25236	6.12745	0	0	6.13785	6.1074	0	6.00942	6.12495	6.13114	0	6.11999	6.12074	5.97879	6.0083	5.94587	0	5.98446	6.16419	6.18361	6.07022	5.97358	0	6.1819
Extracellular	EGCV117	6.16534	6.10952	6.15026	6.15274	0	0	0	6.2103	6.13253	0	6.15786	6.26627	6.10619	6.20761	6.17167	6.21217	6.10011	6.19016	6.20006	6.26419	6.20087	6.30911	6.21194	6.18902	6.21857	6.18139	6.23573	6.07839	0	6.16517
Extracellular	EGCV118	5.99942	6.02535	5.78588	0	0	0	5.78948	0	0	0	6.04957	0	0	0	5.93647	0	0	0	0	5.87108	5.88175	0	0	5.99038	0	0	0	0	0	0
Extracellular	EGCV119	6.03965	0	0	0	0	0	0	0	0	0	0	0	0	0	0	0	0	5.72102	0	0	0	5.83879	0	0	0	0	0	0	0	0
Extracellular	EGCV120	5.96179	0	5.89797	5.98695	5.96441	0	5.8478	0	5.82782	0	0	6.03969	6.06078	0	0	5.79678	0	5.79931	0	0	0	5.81568	5.77052	5.91364	5.841	0	6.00736	5.95626	0	0
Extracellular	EGCV121	5.9484	6.0673	0	0	6.03941	0	0	0	0	0	5.98526	6.02327	0	0	0	0	0	0	0	0	0	0	0	0	0	0	0	0	0	0
Extracellular	EGCV122	5.90949	0	0	5.86874	0	0	0	0	0	0	0	6.04081	5.88885	0	5.8187	0	0	0	5.71661	0	5.69593	0	0	0	5.84243	5.85086	0	5.82249	0	0
Extracellular	EGCV123	5.91155	0	0	0	6.01552	0	0	6.05511	0	0	0	6.28451	6.09137	0	0	5.75653	0	0	0	5.92051	0	0	0	0	0	0	0	0	0	5.97399
Extracellular	EGCV124	5.84878	0	0	0	0	0	0	6.03857	0	0	0	0	0	0	0	0	0	0	0	0	0	0	0	5.87035	5.99624	0	0	0	0	6.08398
Extracellular	EGCV125	5.82257	5.92605	5.79137	5.73225	6.07502	0	5.72334	5.9115	5.88653	0	5.84251	6.16972	0	0	0	5.68509	5.63634	5.48882	5.95093	5.79494	5.74849	5.84683	5.71678	5.80402	5.84665	5.85371	5.85683	5.64429	0	5.85992
Extracellular	EGCV126	5.64593	0	0	0	0	0	0	5.74095	0	0	0	5.93427	0	0	0	0	0	0	5.73989	0	0	0	0	0	0	0	5.77943	0	0	5.88958
Extracellular	EGCV127	5.69619	5.69581	5.42177	5.861	6.07752	6.06397	5.61875	5.72369	5.68877	0	5.62063	0	5.8667	5.40252	5.56142	5.85063	0	5.76456	6.2349	6.09061	6.11797	5.73418	0	5.74652	0	5.76176	5.79897	5.83699	5.83959	6.01231
Extracellular	EGCV128	5.64104	0	0	0	0	0	0	5.69615	5.56804	0	0	5.65755	0	0	0	0	0	0	0	0	0	0	0	0	0	0	0	0	0	5.79608
Extracellular	EGCV129	5.48739	0	0	0	0	0	0	0	0	0	0	0	0	0	0	0	0	0	0	0	0	5.65974	0	5.42941	0	5.6186	0	0	0	0
Extracellular	EGCV130	5.45616	5.52994	5.17444	5.47902	5.91783	0	5.35612	5.76719	0	0	5.32852	0	5.77724	0	0	5.24609	0	5.1195	0	5.30674	0	5.28738	0	5.47563	5.2265	5.36276	0	0	0	0
Extracellular	EGCV131	5.42584	0	0	0	0	0	0	0	0	0	0	0	0	0	0	0	5.32971	5.37605	0	0	0	0	0	5.21128	0	0	0	0	0	0
Extracellular	EGCV132	5.33565	0	0	5.32483	0	0	0	0	0	5.45144	5.27932	0	0	5.04211	5.16808	0	4.98364	0	5.28114	5.25384	0	0	4.87475	5.32836	5.2724	0	5.23836	5.18687	0	0
Extracellular	EGCV133	5.32895	0	0	0	0	0	5.28271	0	0	0	0	0	0	0	0	0	0	5.14857	0	0	0	5.43657	5.45499	5.31344	0	0	0	0	0	5.46301
Extracellular	EGCV134	5.18892	0	0	0	0	5.36488	0	0	0	5.30961	0	0	0	0	0	0	0	0	0	5.21296	0	5.12808	0	5.27028	5.16025	5.25038	0	5.16118	0	0
Extracellular	EGCV135	5.12778	5.09619	0	0	5.56406	0	0	0	0	0	0	0	5.37661	0	0	0	0	0	0	0	0	0	0	0	0	4.93216	0	0	0	0
Extracellular	EGCV136	0	0	8.55147	8.6849	0	0	0	0	0	8.55629	0	0	0	8.61358	8.58184	0	8.42778	0	8.72754	8.67502	8.62707	0	8.57645	8.72582	8.71025	0	8.70828	8.64739	8.43523	0
Extracellular	EGCV137	0	0	0	8.13343	0	0	8.26695	8.20005	0	8.02719	8.18852	8.15363	0	8.1161	8.03737	8.29811	7.99895	8.22729	8.27989	8.31495	8.22097	8.27297	8.15354	8.17762	8.25016	8.24125	8.24386	8.09141	7.78823	8.17294
Extracellular	EGCV138	0	8.04526	0	7.94893	8.23801	8.14049	8.02023	8.12422	8.12907	0	0	8.16232	0	0	0	0	0	0	0	0	7.79574	0	0	0	0	0	0	0	0	0
Extracellular	EGCV139	0	0	0	7.74865	0	0	0	0	0	0	0	0	0	0	7.46487	0	7.17194	0	0	0	0	0	7.12687	0	0	0	0	7.58133	7.47497	0
Extracellular	EGCV140	0	0	7.44877	7.58242	0	0	0	0	0	0	7.55546	0	0	0	0	0	0	0	0	0	0	0	7.47051	0	7.574	0	0	7.4721	0	0
Extracellular	EGCV141	0	0	0	7.34878	0	0	7.29952	7.39941	0	0	0	0	0	0	0	0	0	0	0	0	0	0	0	0	7.26295	0	0	0	0	7.3902
Extracellular	EGCV142	0	0	0	7.31245	0	0	0	0	0	0	0	7.35562	0	0	0	0	0	0	0	0	0	0	0	0	0	0	0	0	0	0
Extracellular	EGCV143	0	0	0	7.15599	0	0	0	0	0	0	0	7.13609	7.21841	7.00621	6.99983	0	6.94705	0	0	0	0	0	0	0	0	0	0	7.07415	0	7.22942
Extracellular	EGCV144	0	7.04539	7.04341	7.07498	0	0	0	6.96879	7.10006	0	7.07968	7.08067	7.05924	0	7.07335	7.10541	7.07047	7.05998	7.0387	7.00286	7.02696	7.06438	7.06693	7.05011	7.08195	7.04665	7.09712	7.07127	6.9797	7.00348
Extracellular	EGCV145	0	6.86894	0	6.96764	0	0	0	0	7.01071	0	0	7.00806	0	0	0	0	0	0	0	0	6.98317	0	0	0	0	0	0	0	6.99902	0
Extracellular	EGCV146	0	6.74401	6.43099	6.73208	0	0	0	0	0	0	0	6.67678	0	0	0	6.74201	0	6.62405	0	0	6.34524	0	0	6.69236	0	0	0	6.65455	0	0
Extracellular	EGCV147	0	6.8131	6.78318	6.65527	6.8163	0	0	6.80408	6.76399	0	6.82517	6.74283	6.75005	0	0	0	0	6.72506	6.88234	0	0	6.938	0	6.75251	6.66737	0	0	6.74092	0	0
Extracellular	EGCV148	0	6.671	0	6.64023	0	6.84831	6.64699	6.70642	6.81057	0	0	0	0	0	0	0	0	0	6.69994	6.53973	6.54353	6.54168	0	6.64705	6.64174	6.57098	6.68111	6.4495	0	6.70424
Extracellular	EGCV149	0	0	6.31084	6.44288	0	0	6.43243	0	0	0	0	0	0	0	6.33371	0	6.29042	0	0	0	0	0	6.25135	6.45135	0	0	0	6.39779	6.44996	0
Extracellular	EGCV150	0	6.55478	0	6.31708	0	0	0	0	6.58586	0	0	0	0	0	0	0	0	6.47289	6.34659	0	0	6.24406	0	0	6.35625	6.34098	0	0	0	0
Extracellular	EGCV151	0	6.31046	6.21769	6.29456	0	0	0	6.27258	6.30266	0	6.33872	6.28708	6.30679	0	0	6.2752	6.2973	6.31732	6.23148	0	6.25574	6.29888	6.25271	6.26707	6.32142	6.24816	0	6.28719	6.19525	6.21875
Extracellular	EGCV152	0	6.31406	0	6.31795	0	0	0	6.34425	0	0	0	0	6.31054	0	0	6.34779	0	0	0	6.36513	0	0	0	6.27549	6.34102	0	6.34165	0	6.26409	0
Extracellular	EGCV153	0	0	0	6.2591	6.47741	0	6.20819	0	0	0	0	6.21876	0	0	0	0	0	6.26957	0	0	0	0	0	0	0	0	0	0	0	0
Extracellular	EGCV154	0	0	0	6.23642	0	0	6.26873	6.4193	6.43836	0	6.2122	0	6.48324	0	0	0	0	0	0	0	0	0	0	0	6.29618	0	0	0	0	0
Extracellular	EGCV155	0	0	6.05866	6.21562	0	0	6.18104	6.43562	6.42556	0	6.1188	6.32414	0	5.7693	6.01012	0	5.90921	6.19113	6.0608	5.90984	0	6.08823	5.75615	6.0332	6.19692	6.12777	0	6.15521	6.01253	6.35772
Extracellular	EGCV156	0	0	0	6.19625	0	6.16981	0	0	0	0	0	6.23056	5.96099	0	0	0	0	0	0	0	0	0	0	0	0	0	0	0	0	0
Extracellular	EGCV157	0	6.15052	0	6.11659	6.22187	0	0	0	0	0	6.0933	0	6.14897	0	0	6.21025	0	0	6.14279	0	0	0	0	6.07622	5.94702	6.03782	0	0	6.09962	0
Extracellular	EGCV158	0	5.98968	5.85238	6.15338	0	0	5.99775	6.02699	0	0	0	6.21327	6.1761	0	0	0	0	6.13178	0	0	0	5.94824	0	5.91441	5.89583	5.82541	0	0	6.18244	6.1217
Extracellular	EGCV159	0	6.28439	0	6.14126	0	0	0	0	0	6.33614	0	0	0	0	6.17272	6.03939	0	0	6.07826	6.02178	0	0	0	6.25789	0	0	0	0	6.25734	0
Extracellular	EGCV160	0	0	0	5.95629	0	0	0	0	0	0	0	0	0	0	0	0	0	0	0	0	5.83742	0	5.56537	0	5.91085	5.91062	0	0	0	0
Extracellular	EGCV161	0	0	0	5.90643	6.0098	0	0	0	5.99609	0	0	6.0749	0	0	0	0	0	0	0	0	0	0	0	0	5.86282	0	5.96078	0	0	5.99332
Extracellular	EGCV162	0	5.75459	5.85022	5.87002	0	0	5.81197	5.64045	5.74153	0	0	5.83303	5.83154	0	5.83596	5.72813	0	5.77466	0	5.6064	5.83923	5.61896	0	5.73765	5.83896	5.68815	5.80789	5.79583	0	5.77568
Extracellular	EGCV163	0	0	0	5.83563	5.87804	6.09726	0	5.87671	5.92165	0	5.85429	0	5.89913	0	0	0	0	0	0	0	0	0	5.84504	0	0	0	0	0	0	0
Extracellular	EGCV164	0	5.69326	5.36718	5.66902	0	6.00159	5.63694	0	0	0	0	0	0	0	0	5.66573	0	0	0	0	0	0	0	0	0	5.49713	5.54774	0	0	5.75466
Extracellular	EGCV165	0	0	0	5.66409	0	0	5.81621	0	0	0	5.73026	0	0	5.8815	0	5.72368	0	0	5.68586	5.74483	0	5.65779	0	0	0	0	5.75732	0	0	0
Extracellular	EGCV166	0	5.6259	0	5.62606	0	0	5.59737	5.70296	0	0	0	0	0	0	5.63967	0	5.52246	0	0	0	5.65997	0	0	5.6079	0	0	0	0	0	0
Extracellular	EGCV167	0	0	0	5.54806	0	0	0	0	0	0	0	0	0	0	5.52934	0	0	0	0	0	0	0	5.46551	0	5.57696	5.65594	0	0	0	0
Extracellular	EGCV168	0	5.44991	0	5.34238	5.63582	0	5.469	5.62524	5.62637	0	5.20352	0	0	0	0	5.3833	0	5.26057	0	5.23327	5.28298	0	0	5.3043	0	5.44344	5.40679	5.26551	5.18409	5.59972
Extracellular	EGCV169	0	0	0	4.93121	0	0	5.05216	0	4.95593	0	0	0	0	0	0	0	0	0	0	0	0	0	0	0	0	0	0	0	0	0
Extracellular	EGCV170	0	8.39277	8.31436	0	8.40193	0	8.33433	8.42839	8.4111	0	8.29814	0	0	8.19646	0	8.36062	0	8.2784	8.35174	8.31966	8.34507	8.26315	8.17636	8.38204	0	8.37949	0	8.34692	0	8.4395
Extracellular	EGCV171	0	7.79093	0	0	7.81239	7.74803	7.77775	7.69886	7.77899	0	0	0	7.72795	7.80827	7.78981	0	7.70888	0	0	0	0	0	0	7.70082	0	7.70463	0	0	0	7.81412
Extracellular	EGCV172	0	0	0	0	7.21609	7.22878	7.01934	0	7.21865	0	6.89851	7.25621	0	0	0	0	0	0	0	0	0	0	0	0	0	7.02366	0	0	0	7.10436
Extracellular	EGCV173	0	0	0	0	6.88144	0	6.85547	0	0	0	6.78765	6.80501	0	0	0	0	0	0	0	0	0	0	0	6.66716	0	6.81649	0	0	0	0
Extracellular	EGCV174	0	0	0	0	7.12602	7.1708	6.79073	0	0	0	0	0	0	6.91123	0	6.93089	0	0	7.19783	6.9741	0	6.80717	0	6.94259	0	7.0825	0	0	0	0
Extracellular	EGCV175	0	6.82733	0	0	6.96414	6.59585	6.60214	0	0	0	7.11842	7.21871	0	7.19588	0	6.96372	0	0	6.75302	6.36959	7.07179	0	0	7.13064	0	6.87223	0	0	0	0
Extracellular	EGCV176	0	0	0	0	6.55509	0	6.43912	6.45581	6.51898	0	0	6.43068	6.39707	0	0	0	0	0	6.47825	0	0	0	0	6.37328	6.46553	6.48442	6.4955	0	6.21392	6.47581
Extracellular	EGCV177	0	0	0	0	6.53504	0	6.40881	0	6.48729	0	6.4137	6.47041	6.48272	0	0	0	0	0	6.48791	0	0	0	0	6.38478	6.47107	0	0	0	6.37488	0
Extracellular	EGCV178	0	6.33696	6.10935	0	6.35843	0	6.33903	6.43211	6.50132	0	6.11857	0	0	0	0	0	0	0	0	0	0	0	0	0	6.2769	0	0	0	0	0
Extracellular	EGCV179	0	0	0	0	0	6.2952	6.21482	0	0	0	0	6.21851	0	0	0	0	0	0	0	0	0	0	0	0	0	0	0	0	0	6.21717
Extracellular	EGCV180	0	5.97661	6.26084	0	6.29932	6.15999	6.03527	0	0	0	0	0	0	5.9156	6.20731	6.0261	6.20221	0	6.05906	6.07823	6.30338	6.16351	5.9771	0	6.10014	5.97496	6.19629	0	0	0
Extracellular	EGCV181	0	0	5.88109	0	6.13147	0	5.98932	6.04123	0	0	6.00588	0	0	0	0	6.03525	0	6.01968	6.08199	0	5.98573	6.03965	5.93661	5.95262	5.96432	6.02699	0	5.88503	0	0
Extracellular	EGCV182	0	0	0	0	0	6.26573	5.95851	6.23939	0	0	0	0	0	0	5.92289	0	0	0	0	0	0	0	0	0	0	0	0	5.88753	0	0
Extracellular	EGCV183	0	0	0	0	0	0	5.93074	0	6.16792	0	0	0	0	0	0	0	0	0	0	0	0	0	0	0	0	6.10995	0	0	0	6.01791
Extracellular	EGCV184	0	0	5.96954	0	0	0	5.90531	0	0	0	0	0	0	0	5.85619	5.93256	0	0	0	0	0	0	0	0	0	0	0	0	0	0
Extracellular	EGCV185	0	0	5.48075	0	0	0	5.88668	0	0	0	0	0	0	0	0	0	0	0	0	0	0	5.79542	0	0	0	0	5.66122	5.16238	0	0
Extracellular	EGCV186	0	0	0	0	0	0	0	0	0	8.28648	8.29352	8.34386	0	8.32753	8.33366	8.34088	8.37278	8.31935	8.35427	8.28138	8.2099	0	8.20335	8.39021	8.3738	8.34721	0	8.37779	8.13192	0
Extracellular	EGCV187	0	0	0	0	0	0	0	0	0	8.00185	7.86813	0	0	7.5796	7.99011	0	7.66689	0	0	0	0	0	0	7.91451	0	0	0	7.98029	7.94075	0
Extracellular	EGCV188	0	0	0	0	0	0	0	0	0	7.54013	7.69838	0	7.99974	7.44762	7.51324	7.88355	7.28184	7.70179	7.86366	7.79593	0	7.76146	7.42695	7.83373	7.79522	7.80383	7.72086	7.55998	7.26173	7.93995
Extracellular	EGCV189	0	0	0	0	0	0	0	7.13225	0	7.24455	0	7.25011	0	0	0	0	0	0	0	0	0	0	0	6.99528	0	0	0	6.95618	0	0
Extracellular	EGCV190	0	0	0	0	0	0	0	0	0	5.99299	0	0	0	5.44734	5.74629	0	0	0	0	5.51308	5.74594	0	0	0	0	0	0	0	0	0
Extracellular	EGCV191	0	0	0	0	8.69037	8.61456	0	8.56944	8.53704	0	0	8.65864	8.64364	0	0	0	0	0	0	0	0	0	0	0	0	0	0	0	0	8.56454
Extracellular	EGCV192	0	0	0	0	0	0	0	0	0	0	7.93871	0	8.16303	0	0	0	0	0	8.06841	7.98864	0	7.98812	0	8.01192	7.98	7.98634	7.95824	0	0	8.12328
Extracellular	EGCV193	0	7.2599	0	0	0	7.63682	0	7.3153	0	0	0	0	7.65413	0	0	0	0	7.29782	0	0	0	0	0	0	0	0	0	0	0	7.62327
Extracellular	EGCV194	0	0	0	0	7.52461	0	0	0	0	0	0	7.55237	7.54476	0	0	0	0	0	0	0	0	0	0	0	0	0	0	0	0	0
Extracellular	EGCV195	0	0	0	0	6.86981	6.87018	0	0	6.78716	0	6.86381	7.15969	7.17076	0	0	6.87444	0	0	6.74168	0	0	6.75105	0	0	6.64696	6.92698	0	6.85402	0	0
Extracellular	EGCV196	0	0	0	0	0	0	0	6.51538	0	0	0	0	6.78019	0	0	0	0	6.46368	0	0	0	0	0	0	0	0	0	0	0	6.59128
Extracellular	EGCV197	0	0	0	0	0	0	0	6.65666	0	0	0	6.75831	6.74544	0	0	6.5595	5.92215	6.31622	6.52832	6.6538	0	0	0	0	0	0	6.46307	0	0	0
Extracellular	EGCV198	0	0	0	0	0	0	0	0	0	0	6.33942	0	6.3066	6.13216	6.0996	0	0	0	0	0	6.25521	0	6.17859	0	0	6.36909	0	0	0	0
Extracellular	EGCV199	0	0	0	0	6.36022	0	0	0	0	0	0	0	6.24806	0	0	0	0	0	0	0	0	0	0	0	0	0	0	0	0	0
Extracellular	EGCV200	0	5.93915	0	0	0	0	0	0	0	0	5.69671	0	6.07371	0	0	0	0	0	5.78603	0	0	0	0	5.78101	0	0	0	0	0	6.0027
Extracellular	EGCV201	0	0	0	0	0	0	0	0	0	0	5.81787	0	6.17281	5.72946	5.78494	0	0	0	5.96073	0	0	0	0	0	5.99413	6.09265	0	5.87944	0	0
Extracellular	EGCV202	0	0	0	0	0	0	0	5.88456	0	0	0	6.05894	6.03864	0	0	0	0	0	0	0	0	0	0	0	0	0	0	0	0	0
Extracellular	EGCV203	0	0	0	0	5.8722	0	0	0	0	0	0	5.81219	5.83681	0	0	0	0	0	0	0	0	0	0	0	0	0	0	0	0	0
Extracellular	EGCV204	0	0	0	0	5.83416	0	0	0	5.85746	0	0	0	5.78733	0	0	0	0	0	0	0	0	0	0	0	6.03547	5.72558	0	0	0	0
Extracellular	EGCV205	0	5.68247	0	0	5.69742	0	0	0	0	0	0	5.71614	5.73684	0	0	0	0	0	5.655	0	0	0	0	0	0	0	0	0	0	0
Extracellular	EGCV206	0	5.64342	0	0	0	5.71186	0	5.67247	0	0	0	5.77346	5.67733	0	0	0	0	0	0	0	0	0	0	5.56861	0	0	5.6256	0	0	0
Extracellular	EGCV207	0	0	0	0	5.68871	0	0	5.98194	5.93642	0	0	5.71799	5.57666	0	0	5.79928	0	0	5.77185	0	5.63253	0	0	0	0	5.79906	0	5.71092	0	5.96628
Extracellular	EGCV208	0	0	0	0	0	0	0	0	0	0	5.18252	0	5.51732	4.7682	0	0	5.02464	5.20208	0	0	5.27228	0	0	0	0	0	0	0	0	0
Extracellular	EGCV209	0	0	0	0	5.21353	0	0	0	0	0	5.39586	0	5.15758	0	0	0	0	0	0	0	0	0	0	0	5.35379	5.34092	0	0	0	0
Extracellular	EGCV210	0	5.21834	0	0	0	0	0	0	5.35723	0	0	0	5.22646	0	0	0	0	0	0	5.07145	5.0038	0	0	0	5.1347	0	5.33737	5.1214	0	5.1332
Extracellular	EGCV211	0	0	0	0	0	0	0	0	0	0	0	0	0	0	8.38114	8.35603	0	0	8.31554	8.23329	0	8.23957	0	0	0	0	0	0	0	0
Extracellular	EGCV212	0	0	0	0	0	0	0	0	0	0	8.06644	0	0	0	0	8.16079	0	0	0	8.19415	0	0	0	0	0	0	8.07956	0	0	0
Extracellular	EGCV213	0	0	0	0	0	0	0	0	0	0	0	0	0	0	0	8.13186	0	0	8.01732	0	8.07874	0	0	7.9847	0	0	0	0	0	0
Extracellular	EGCV214	0	0	0	0	0	0	0	0	0	0	0	0	0	0	0	7.62467	0	0	7.70884	0	7.62066	0	0	7.70082	0	7.6771	0	0	0	0
Extracellular	EGCV215	0	0	0	0	0	0	0	0	0	0	0	0	0	0	0	7.56507	0	0	7.40686	0	0	0	0	0	0	0	0	0	0	0
Extracellular	EGCV216	0	0	0	0	0	0	0	0	0	0	0	0	0	7.44204	0	7.26664	7.05056	0	7.24307	7.2831	7.13776	0	0	0	0	7.22171	0	0	0	0
Extracellular	EGCV217	0	0	7.23607	0	0	0	0	0	0	0	7.17737	7.58302	0	0	0	7.24007	0	0	6.9875	0	0	7.14638	7.25318	7.29897	0	7.43076	0	7.59991	0	0
Extracellular	EGCV218	0	6.36475	0	0	0	0	0	0	0	0	0	6.54261	0	0	0	6.53754	6.32298	6.39347	0	0	0	0	0	0	6.31938	0	0	0	0	6.60885
Extracellular	EGCV219	0	0	0	0	0	0	0	0	0	0	0	0	0	0	0	6.52472	0	0	0	6.33822	0	6.46374	0	0	0	0	0	0	0	0
Extracellular	EGCV220	0	0	0	0	0	0	0	0	0	0	0	0	0	5.78871	6.34983	6.336	5.80171	0	6.15996	6.13367	0	0	6.02512	0	0	0	0	0	0	0
Extracellular	EGCV221	0	6.30003	0	0	0	0	0	6.31738	6.25712	0	6.40325	6.37229	0	0	0	6.40264	6.29349	0	0	0	0	6.33345	6.37068	0	0	6.38923	0	6.28578	0	0
Extracellular	EGCV222	0	0	6.34177	0	0	0	0	0	0	0	0	0	0	0	0	6.3192	0	0	0	0	6.36085	0	0	6.37413	0	0	0	0	0	0
Extracellular	EGCV223	0	0	0	0	0	6.16361	0	0	0	0	5.94236	0	0	5.79641	5.94015	6.30353	6.11479	6.22863	0	0	0	0	0	0	0	6.05169	0	5.94596	0	6.1249
Extracellular	EGCV224	0	0	6.05692	0	0	0	0	0	0	0	0	0	0	0	0	6.09559	0	0	6.10362	6.17381	5.97326	6.25	6.01045	0	0	6.1585	0	0	0	0
Extracellular	EGCV225	0	5.81657	0	0	0	0	0	0	0	0	5.68723	5.87131	0	0	0	5.80242	0	0	5.80224	0	0	0	0	0	0	0	0	0	0	0
Extracellular	EGCV226	0	0	5.82233	0	0	0	0	0	0	0	5.7702	0	0	0	5.88533	5.80416	5.87839	0	0	0	5.79598	0	5.80044	0	5.89894	5.79747	5.93808	0	0	0
Extracellular	EGCV227	0	0	0	0	5.60861	0	0	0	0	0	0	5.7268	0	0	0	5.7863	5.50705	5.69117	5.2993	0	0	5.1493	0	0	5.30336	5.33673	0	5.28044	0	5.66941
Extracellular	EGCV228	0	0	5.67562	0	0	0	0	5.523	0	0	0	0	0	0	0	5.72578	0	0	5.66787	0	0	0	0	0	0	0	0	0	0	0
Extracellular	EGCV229	0	0	5.60966	0	0	0	0	0	0	0	0	0	0	0	0	5.55084	0	0	0	0	5.68267	0	0	0	0	5.76728	0	0	0	0
Extracellular	EGCV230	0	0	5.56156	0	0	0	0	0	0	0	0	5.70144	0	0	0	5.55441	0	0	0	0	0	0	0	0	0	0	0	0	0	0
Extracellular	EGCV231	0	0	7.32606	0	0	0	0	0	0	0	0	0	0	7.18862	0	0	7.2408	0	7.64822	7.46328	7.37889	7.49716	0	7.39173	0	0	0	7.40105	7.36447	0
Extracellular	EGCV232	0	7.45887	7.32933	0	0	7.53982	0	7.5643	0	0	7.39087	7.71258	0	7.3079	0	0	0	0	7.48456	7.56527	7.28231	7.26748	0	7.30498	0	7.49194	0	7.15366	0	0
Extracellular	EGCV233	0	0	0	0	0	0	0	7.27014	0	0	0	7.36455	0	0	0	0	0	0	7.23793	0	0	0	0	7.29451	0	7.30019	0	0	7.28307	7.33216
Extracellular	EGCV234	0	0	0	0	0	0	0	0	7.36234	0	7.26942	0	0	7.02468	0	0	0	0	7.10175	0	0	7.05505	0	0	0	0	0	0	0	0
Extracellular	EGCV235	0	0	0	0	0	0	0	0	0	0	0	0	0	0	0	0	0	6.36418	6.5465	0	6.49564	0	0	0	0	0	0	0	0	0
Extracellular	EGCV236	0	0	0	0	0	0	0	0	0	0	0	0	0	6.59309	0	0	0	6.40754	6.47409	0	0	0	0	0	0	6.47374	0	0	0	0
Extracellular	EGCV237	0	0	0	0	6.62362	0	0	6.5658	6.56499	0	6.40657	0	0	0	0	0	0	0	6.44421	0	0	0	0	0	0	0	0	0	0	0
Extracellular	EGCV238	0	0	0	0	0	6.08941	0	0	0	0	0	0	0	0	0	0	0	0	6.32791	0	6.18978	0	0	0	0	0	0	0	0	0
Extracellular	EGCV239	0	0	0	0	0	0	0	0	0	0	0	0	0	0	0	0	0	0	6.28446	6.32711	0	6.22338	0	0	0	6.27502	6.31458	0	0	0
Extracellular	EGCV240	0	0	0	0	5.96793	0	0	0	0	0	0	0	0	0	5.96254	0	0	0	5.89553	0	5.87742	0	0	0	5.91155	0	0	0	0	0
Extracellular	EGCV241	0	0	0	0	0	0	0	0	0	0	0	0	0	5.93997	0	0	0	0	5.87762	5.98877	0	0	0	0	0	0	0	0	0	0
Extracellular	EGCV242	0	5.56316	0	0	0	0	0	0	0	0	0	0	0	0	0	0	5.6179	5.82258	5.71317	5.5415	0	5.74781	0	5.80921	5.87452	5.98824	5.81755	0	0	0
Extracellular	EGCV243	0	5.71815	0	0	0	0	0	0	0	0	0	0	0	0	0	0	0	0	5.56176	0	0	5.52927	0	0	5.54672	5.55284	0	0	0	0
Extracellular	EGCV244	0	0	6.1314	0	0	6.09756	0	0	0	0	6.12325	0	0	0	0	0	0	0	0	0	5.97086	6.20531	0	6.19543	0	6.18509	0	6.29934	0	0
Extracellular	EGCV245	0	0	4.77518	0	0	5.11138	0	0	0	0	0	0	0	0	0	0	0	4.99713	0	4.95773	0	4.99527	0	0	0	0	0	0	0	4.98552
Extracellular	EGCV246	0	7.7976	0	0	0	0	0	7.81354	7.78972	0	0	0	0	0	0	0	0	0	0	0	0	0	0	0	7.82427	0	0	0	0	0
Extracellular	EGCV247	0	0	0	0	0	0	0	0	0	0	7.75272	0	0	0	0	0	0	7.68228	0	0	0	0	7.67415	0	7.75187	0	0	7.59747	0	0
Extracellular	EGCV248	0	0	0	0	0	0	0	0	6.8629	0	0	0	0	0	0	0	0	0	0	0	0	0	6.76164	0	6.84696	0	6.90471	0	0	6.77078
Extracellular	EGCV249	0	0	0	0	0	0	0	0	0	0	0	0	0	0	0	0	6.67729	0	0	0	0	0	0	6.54082	6.61153	6.58113	0	0	6.56153	0
Extracellular	EGCV250	0	0	5.64395	0	0	0	0	0	0	0	5.64198	0	0	5.58767	0	0	0	0	0	5.67448	0	0	5.62259	0	5.76055	5.56668	5.71057	0	0	0
Extracellular	EGCV251	0	0	0	0	0	5.54103	0	5.34906	0	0	0	5.46772	0	0	0	0	0	0	0	0	0	0	0	5.08138	4.92827	0	4.96403	0	0	0
Extracellular	EGCV252	0	0	0	0	0	0	0	0	0	0	0	0	0	0	0	0	0	0	0	0	8.35477	0	0	0	0	8.35301	0	8.34999	0	0
Extracellular	EGCV253	0	0	7.40812	0	0	0	0	0	0	0	0	0	0	0	7.48292	0	0	0	0	0	7.43247	0	7.38185	0	0	0	0	7.47975	7.47097	0
Extracellular	EGCV254	0	0	0	0	0	0	0	0	0	0	0	0	0	6.36527	0	0	0	0	0	0	0	0	0	0	0	6.40913	0	6.22741	6.40944	0
Extracellular	EGCV255	0	5.69602	0	0	0	0	0	0	0	0	0	5.7635	0	0	0	0	0	0	0	0	0	0	0	0	0	0	0	5.42313	5.60681	0
Extracellular	EGCV256	0	7.27895	0	0	0	0	0	7.31953	0	0	7.30825	0	0	7.549	0	0	0	0	0	0	0	0	0	0	0	7.32785	0	0	7.33587	0
Extracellular	EGCV257	0	6.232	0	0	0	6.29734	0	0	0	0	0	6.38543	0	0	0	0	0	0	0	0	0	0	0	0	0	0	0	0	0	0
Extracellular	EGCV258	0	4.71799	0	0	0	0	0	0	0	0	0	0	0	0	0	0	0	0	0	0	0	0	0	4.76237	0	0	0	0	0	0
Extracellular	EGCV259	0	0	0	0	7.44126	0	0	0	0	0	0	0	0	0	7.5085	0	7.43462	0	0	0	0	0	0	0	0	0	7.62045	0	0	0
Extracellular	EGCV260	0	0	0	0	0	0	0	7.45154	7.53718	0	0	0	0	0	0	0	0	0	0	0	0	0	0	0	0	0	0	0	0	0
Extracellular	EGCV261	0	0	0	0	0	0	0	7.03228	7.02026	0	7.00024	0	0	0	0	0	0	0	0	0	0	0	0	0	0	0	0	0	0	0
Extracellular	EGCV262	0	0	0	0	0	0	0	0	0	0	0	0	0	7.17096	7.23031	0	7.28013	0	0	0	0	0	7.26013	0	0	0	7.44324	0	7.38809	0
Extracellular	EGCV263	0	0	0	0	0	0	0	0	0	0	0	0	0	6.16678	0	0	0	6.11347	0	0	0	0	0	0	0	6.34796	6.38946	0	0	0
Extracellular	EGCV264	0	0	7.13678	0	0	0	0	0	0	0	0	0	0	0	0	0	7.2468	7.17703	0	0	0	0	0	0	0	0	7.29445	0	0	0
Extracellular	EGCV265	0	0	0	0	0	0	0	0	6.89909	0	0	0	0	0	0	0	0	6.6807	0	6.77553	0	0	0	0	0	0	0	0	6.62311	0
Extracellular	EGCV266	0	0	0	0	0	0	0	0	0	0	0	0	0	0	0	0	0	0	0	0	0	0	0	0	0	0	5.2301	0	5.08005	5.17092
Extracellular	EGCV267	0	0	0	0	0	0	0	0	0	0	0	0	0	0	0	0	0	0	0	0	0	0	0	0	0	0	0	0	0	0
Extracellular	EGCV268	0	0	0	0	0	0	0	0	7.40974	0	0	0	0	0	0	0	0	0	0	0	0	0	0	0	0	0	0	0	0	0
Extracellular	EGCV269	0	0	0	0	0	0	0	0	0	0	0	0	0	0	0	0	0	0	0	0	0	0	0	0	0	0	0	0	0	0
Extracellular	EGCV270	0	0	0	0	0	5.93817	0	0	0	0	0	0	0	0	0	0	0	0	0	0	0	0	0	5.58759	0	0	0	0	0	5.70807
Extracellular	EGCV271	0	0	0	0	0	0	0	0	0	0	0	0	0	0	0	0	0	0	0	0	0	0	0	0	0	0	0	0	0	0
Extracellular	EGCV272	0	0	0	0	0	6.46641	0	0	0	0	0	0	0	0	0	0	0	0	0	0	0	0	0	0	0	0	0	0	0	6.45917
Extracellular	EGCV273	0	0	0	0	0	0	0	0	0	0	0	0	0	0	0	0	0	0	0	0	0	0	0	0	0	0	0	0	0	0
Extracellular	EGCV274	0	0	0	0	0	5.99475	0	0	0	0	0	0	0	0	5.443	0	0	0	0	0	0	0	0	0	0	0	5.49782	0	0	0

## Sheet: SampleInfo
sampleName	injectionOrder	group
M01_C	17	Control
M02_C	30	Control
M03_C	27	Control
M04_C	11	Control
M05_C	12	Control
M06_C	28	Control
M07_C	6	Control
M08_C	8	Control
M09_C	37	Control
M10_C	20	Control
M01_IL4	33	IL4
M02_IL4	15	IL4
M03_IL4	16	IL4
M04_IL4	3	IL4
M05_IL4	22	IL4
M06_IL4	21	IL4
M07_IL4	24	IL4
M08_IL4	35	IL4
M09_IL4	14	IL4
M10_IL4	4	IL4
M01_LPS	5	LPS
M02_LPS	36	LPS
M03_LPS	10	LPS
M04_LPS	31	LPS
M05_LPS	25	LPS
M06_LPS	2	LPS
M07_LPS	32	LPS
M08_LPS	19	LPS
M09_LPS	26	LPS
M10_LPS	9	LPS
QC_01	1	QC
QC_02	7	QC
QC_03	13	QC
QC_04	18	QC
QC_05	23	QC
QC_06	29	QC
QC_07	34	QC
QC_08	38	QC

## Sheet: VariableInfo
Variablename	RT
IGCV1	9.181
IGCV2	17.082
IGCV3	12.44
IGCV4	15.351
IGCV5	8.533
IGCV6	6.283
IGCV7	16.74
IGCV8	16.913
IGCV9	17.953
IGCV10	17.45
IGCV11	14.184
IGCV12	15.833
IGCV13	17.248
IGCV14	16.532
IGCV15	12.522
IGCV16	18.578
IGCV17	13.584
IGCV18	13.611
IGCV19	18.108
IGCV20	19.896
IGCV21	10.394
IGCV22	14.85
IGCV23	20.316
IGCV24	16.675
IGCV25	9.5
IGCV26	16.953
IGCV27	16.985
IGCV28	9.231
IGCV29	17.476
IGCV30	10.742
IGCV31	12.429
IGCV32	14.907
IGCV33	11.641
IGCV34	6.698
IGCV35	18.884
IGCV36	12.861
IGCV37	16.869
IGCV38	20.649
IGCV39	19.644
IGCV40	22.278
IGCV41	9.935
IGCV42	23.783
IGCV43	22.007
IGCV44	9.678
IGCV45	14.629
IGCV46	15.878
IGCV47	20.538
IGCV48	9.559
IGCV49	6.081
IGCV50	8.416
IGCV51	23.112
IGCV52	16.634
IGCV53	16.485
IGCV54	7.329
IGCV55	25.201
IGCV56	7.093
IGCV57	7
IGCV58	7.58
IGCV59	7.878
IGCV60	26.524
IGCV61	13.286
IGCV62	11.817
IGCV63	6.947
IGCV64	11.674
IGCV65	6.345
IGCV66	7.204
IGCV67	7.848
IGCV68	16.21
IGCV69	7.116
IGCV70	21.379
IGCV71	16.966
IGCV72	6.26
IGCV73	12.208
IGCV74	6.187
IGCV75	17.099
IGCV76	6.133
IGCV77	6.717
IGCV78	11.195
IGCV79	16.834
IGCV80	11.967
IGCV81	6.581
IGCV82	14.479
IGCV83	11.066
IGCV84	15.446
IGCV85	11.325
IGCV86	6.334
IGCV87	15.306
IGCV88	6.764
IGCV89	12.068
IGCV90	12.279
IGCV91	14.307
IGCV92	7.805
IGCV93	22.824
IGCV94	21.25
IGCV95	14.352
IGCV96	13.167
IGCV97	6.89
IGCV98	13.382
IGCV99	19.546
IGCV100	20.185
IGCV101	25.655
IGCV102	7.763
IGCV103	16.17
IGCV104	15.468
IGCV105	12.321
IGCV106	18.086
IGCV107	17.704
IGCV108	10.481
IGCV109	8.613
IGCV110	13.849
IGCV111	13.47
IGCV112	14.037
IGCV113	6.465
IGCV114	21.721
IGCV115	18.128
IGCV116	11.116
IGCV117	15.487
IGCV118	12.033
IGCV119	11.928
IGCV120	10.296
IGCV121	10.974
IGCV122	12.25
IGCV123	13.42
IGCV124	17.624
IGCV125	12.734
IGCV126	21.84
IGCV127	15.986
IGCV128	8.737
IGCV129	20.728
IGCV130	23.384
IGCV131	14.115
IGCV132	19.264
IGCV133	10.533
IGCV134	15.206
IGCV135	24.424
IGCV136	12.436
IGCV137	12.523
IGCV138	13.715
IGCV139	17.474
IGCV140	8.898
IGCV141	20.046
IGCV142	14.502
IGCV143	11.817
IGCV144	6.111
IGCV145	11.364
IGCV146	13.285
IGCV147	5.915
IGCV148	15.081
IGCV149	19.051
IGCV150	22.065
IGCV151	6.099
IGCV152	18.084
IGCV153	10.42
IGCV154	22.032
IGCV155	15.257
IGCV156	14.144
IGCV157	17.704
IGCV158	20.976
IGCV159	37.587
IGCV160	15.138
IGCV161	12.029
IGCV162	18.223
IGCV163	17.797
IGCV164	19.493
IGCV165	19.151
IGCV166	10.874
IGCV167	26.682
IGCV168	21.779
IGCV169	13.982
IGCV170	16.42
IGCV171	9.129
IGCV172	15.475
IGCV173	11.072
IGCV174	12.593
IGCV175	11.848
IGCV176	13.381
IGCV177	24.292
IGCV178	14.145
IGCV179	17.707
IGCV180	22.317
IGCV181	10.582
IGCV182	21.17
IGCV183	17.138
IGCV184	10.971
IGCV185	13.413
IGCV186	13.62
IGCV187	9.207
IGCV188	13.712
IGCV189	7.347
IGCV190	20.974
IGCV191	17.476
IGCV192	13.722
IGCV193	11.611
IGCV194	20.049
IGCV195	16.339
IGCV196	13.738
IGCV197	13.163
IGCV198	14.351
IGCV199	23.876
IGCV200	22.351
IGCV201	23.421
IGCV202	19.712
IGCV203	19.265
IGCV204	19.15
IGCV205	17.854
IGCV206	26.685
IGCV207	24.377
IGCV208	15.194
IGCV209	14.114
IGCV210	20.819
IGCV211	16.531
IGCV212	17.473
IGCV213	8.985
IGCV214	8.943
IGCV215	21.809
IGCV216	11.201
IGCV217	11.568
IGCV218	18.383
IGCV219	13.47
IGCV220	13.74
IGCV221	8.617
IGCV222	12.322
IGCV223	18.277
IGCV224	9.584
IGCV225	9.775
IGCV226	17.535
IGCV227	23.195
IGCV228	7.283
IGCV229	8.747
IGCV230	15.585
IGCV231	8.416
IGCV232	6.809
IGCV233	7.039
IGCV234	8.267
IGCV235	16.15
IGCV236	12.096
IGCV237	12.321
IGCV238	7.33
IGCV239	14.143
IGCV240	24.404
IGCV241	10.022
IGCV242	19.282
IGCV243	17.572
IGCV244	13.739
IGCV245	13.983
IGCV246	16.706
IGCV247	9.113
IGCV248	11.068
IGCV249	18.124
IGCV250	10.873
IGCV251	20.478
IGCV252	16.526
IGCV253	16.885
IGCV254	7.442
IGCV255	19.147
IGCV256	6.733
IGCV257	19.053
IGCV258	24.087
IGCV259	7.058
IGCV260	23.458
IGCV261	16.971
IGCV262	12.861
IGCV263	13.465
IGCV264	6.164
IGCV265	17.608
IGCV266	19.18
IGCV267	16.833
IGCV268	22.413
IGCV269	15.531
IGCV270	19.147
IGCV271	17.67
IGCV272	12.326
IGCV273	20.811
IGCV274	20.161
EGCV1	9.181
EGCV2	17.082
EGCV3	12.44
EGCV4	15.351
EGCV5	8.533
EGCV6	6.283
EGCV7	16.74
EGCV8	16.913
EGCV9	17.953
EGCV10	17.45
EGCV11	14.184
EGCV12	15.833
EGCV13	17.248
EGCV14	16.532
EGCV15	12.522
EGCV16	18.578
EGCV17	13.584
EGCV18	13.611
EGCV19	18.108
EGCV20	19.896
EGCV21	10.394
EGCV22	14.85
EGCV23	20.316
EGCV24	16.675
EGCV25	9.5
EGCV26	16.953
EGCV27	16.985
EGCV28	9.231
EGCV29	17.476
EGCV30	10.742
EGCV31	12.429
EGCV32	14.907
EGCV33	11.641
EGCV34	6.698
EGCV35	18.884
EGCV36	12.861
EGCV37	16.869
EGCV38	20.649
EGCV39	19.644
EGCV40	22.278
EGCV41	9.935
EGCV42	23.783
EGCV43	22.007
EGCV44	9.678
EGCV45	14.629
EGCV46	15.878
EGCV47	20.538
EGCV48	9.559
EGCV49	6.081
EGCV50	8.416
EGCV51	23.112
EGCV52	16.634
EGCV53	16.485
EGCV54	7.329
EGCV55	25.201
EGCV56	7.093
EGCV57	7
EGCV58	7.58
EGCV59	7.878
EGCV60	26.524
EGCV61	13.286
EGCV62	11.817
EGCV63	6.947
EGCV64	11.674
EGCV65	6.345
EGCV66	7.204
EGCV67	7.848
EGCV68	16.21
EGCV69	7.116
EGCV70	21.379
EGCV71	16.966
EGCV72	6.26
EGCV73	12.208
EGCV74	6.187
EGCV75	17.099
EGCV76	6.133
EGCV77	6.717
EGCV78	11.195
EGCV79	16.834
EGCV80	11.967
EGCV81	6.581
EGCV82	14.479
EGCV83	11.066
EGCV84	15.446
EGCV85	11.325
EGCV86	6.334
EGCV87	15.306
EGCV88	6.764
EGCV89	12.068
EGCV90	12.279
EGCV91	14.307
EGCV92	7.805
EGCV93	22.824
EGCV94	21.25
EGCV95	14.352
EGCV96	13.167
EGCV97	6.89
EGCV98	13.382
EGCV99	19.546
EGCV100	20.185
EGCV101	25.655
EGCV102	7.763
EGCV103	16.17
EGCV104	15.468
EGCV105	12.321
EGCV106	18.086
EGCV107	17.704
EGCV108	10.481
EGCV109	8.613
EGCV110	13.849
EGCV111	13.47
EGCV112	14.037
EGCV113	6.465
EGCV114	21.721
EGCV115	18.128
EGCV116	11.116
EGCV117	15.487
EGCV118	12.033
EGCV119	11.928
EGCV120	10.296
EGCV121	10.974
EGCV122	12.25
EGCV123	13.42
EGCV124	17.624
EGCV125	12.734
EGCV126	21.84
EGCV127	15.986
EGCV128	8.737
EGCV129	20.728
EGCV130	23.384
EGCV131	14.115
EGCV132	19.264
EGCV133	10.533
EGCV134	15.206
EGCV135	24.424
EGCV136	12.436
EGCV137	12.523
EGCV138	13.715
EGCV139	17.474
EGCV140	8.898
EGCV141	20.046
EGCV142	14.502
EGCV143	11.817
EGCV144	6.111
EGCV145	11.364
EGCV146	13.285
EGCV147	5.915
EGCV148	15.081
EGCV149	19.051
EGCV150	22.065
EGCV151	6.099
EGCV152	18.084
EGCV153	10.42
EGCV154	22.032
EGCV155	15.257
EGCV156	14.144
EGCV157	17.704
EGCV158	20.976
EGCV159	37.587
EGCV160	15.138
EGCV161	12.029
EGCV162	18.223
EGCV163	17.797
EGCV164	19.493
EGCV165	19.151
EGCV166	10.874
EGCV167	26.682
EGCV168	21.779
EGCV169	13.982
EGCV170	16.42
EGCV171	9.129
EGCV172	15.475
EGCV173	11.072
EGCV174	12.593
EGCV175	11.848
EGCV176	13.381
EGCV177	24.292
EGCV178	14.145
EGCV179	17.707
EGCV180	22.317
EGCV181	10.582
EGCV182	21.17
EGCV183	17.138
EGCV184	10.971
EGCV185	13.413
EGCV186	13.62
EGCV187	9.207
EGCV188	13.712
EGCV189	7.347
EGCV190	20.974
EGCV191	17.476
EGCV192	13.722
EGCV193	11.611
EGCV194	20.049
EGCV195	16.339
EGCV196	13.738
EGCV197	13.163
EGCV198	14.351
EGCV199	23.876
EGCV200	22.351
EGCV201	23.421
EGCV202	19.712
EGCV203	19.265
EGCV204	19.15
EGCV205	17.854
EGCV206	26.685
EGCV207	24.377
EGCV208	15.194
EGCV209	14.114
EGCV210	20.819
EGCV211	16.531
EGCV212	17.473
EGCV213	8.985
EGCV214	8.943
EGCV215	21.809
EGCV216	11.201
EGCV217	11.568
EGCV218	18.383
EGCV219	13.47
EGCV220	13.74
EGCV221	8.617
EGCV222	12.322
EGCV223	18.277
EGCV224	9.584
EGCV225	9.775
EGCV226	17.535
EGCV227	23.195
EGCV228	7.283
EGCV229	8.747
EGCV230	15.585
EGCV231	8.416
EGCV232	6.809
EGCV233	7.039
EGCV234	8.267
EGCV235	16.15
EGCV236	12.096
EGCV237	12.321
EGCV238	7.33
EGCV239	14.143
EGCV240	24.404
EGCV241	10.022
EGCV242	19.282
EGCV243	17.572
EGCV244	13.739
EGCV245	13.983
EGCV246	16.706
EGCV247	9.113
EGCV248	11.068
EGCV249	18.124
EGCV250	10.873
EGCV251	20.478
EGCV252	16.526
EGCV253	16.885
EGCV254	7.442
EGCV255	19.147
EGCV256	6.733
EGCV257	19.053
EGCV258	24.087
EGCV259	7.058
EGCV260	23.458
EGCV261	16.971
EGCV262	12.861
EGCV263	13.465
EGCV264	6.164
EGCV265	17.608
EGCV266	19.18
EGCV267	16.833
EGCV268	22.413
EGCV269	15.531
EGCV270	19.147
EGCV271	17.67
EGCV272	12.326
EGCV273	20.811
EGCV274	20.161
